# Supplementary material for: The microglial P2Y6 receptor mediates neuronal loss and memory deficits in neurodegeneration
Source: PubMed Central journal article supplement (PMC8733854; doi:10.1016/j.celrep.2021.110148), 2021-12-28
Supplement: mmc2.pdf [file mmc2.pdf]

## The microglial P2Y<sub>6</sub> receptor mediates neuronal loss and memory deficits in neurodegeneration

### Graphical abstract

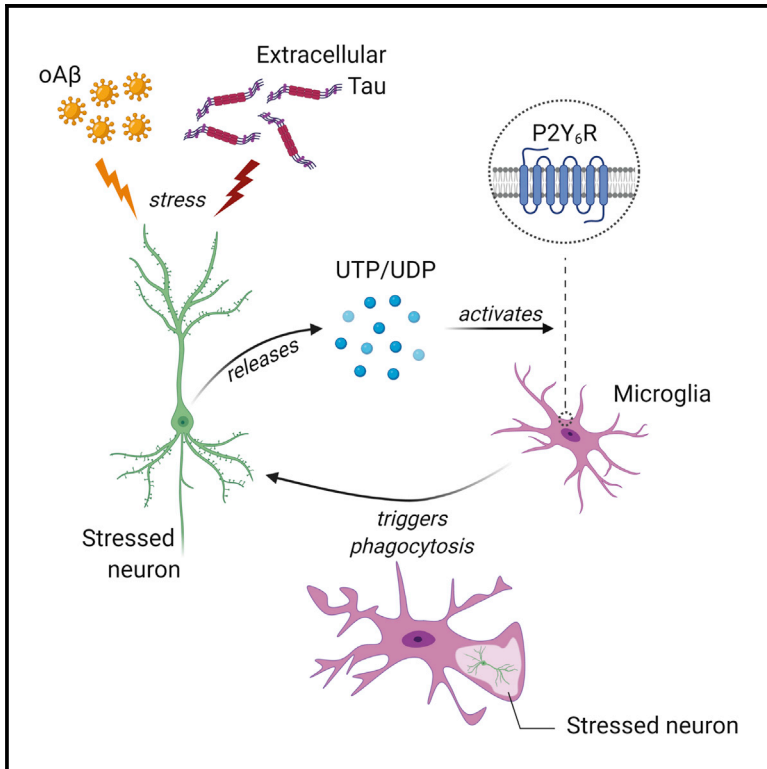

### Authors

Mar Puigdel·l·ivol, Stefan Milde, Anna Vilalta, ..., Jack H. Brelstaff, Maria Grazia Spillantini, Guy C. Brown

### Correspondence

gcb3@cam.ac.uk

### In brief

Puigdel·l·ivol et al. find that the knockout of the microglial P2Y<sub>6</sub> receptor, required for microglial engulfment of neurons, prevents neuronal and memory loss in two different mouse models of neurodegeneration, suggesting that neuronal loss in neurodegeneration is due to microglia eating neurons, which may be prevented by blocking the P2Y<sub>6</sub> receptor.

### Highlights

- P2Y<sub>6</sub>R knockout prevents microglial phagocytosis of stressed-but-viable cells
- P2Y<sub>6</sub>R knockout does not alter microglial phagocytosis of healthy or dead cells
- P2Y<sub>6</sub>R knockout prevents microglial phagocytosis of neurons induced by Aβ *in vivo*
- P2Y<sub>6</sub>R knockout reduces neuronal loss and memory deficits induced by Aβ or Tau in mice

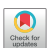

## Report

# The microglial P2Y<sub>6</sub> receptor mediates neuronal loss and memory deficits in neurodegeneration

Mar Puigdellívol,<sup>1,2,6</sup> Stefan Milde,<sup>1,6</sup> Anna Vilalta,<sup>1</sup> Tom O.J. Cockram,<sup>1</sup> David H. Allendorf,<sup>1</sup> Jeffrey Y. Lee,<sup>1</sup> Jacob M. Dundee,<sup>1</sup> Katryna Pampuščenko,<sup>3</sup> Vilmante Borutaite,<sup>3</sup> Hugh N. Nuthall,<sup>4</sup> Jack H. Brelstaff,<sup>5</sup> Maria Grazia Spillantini,<sup>5</sup> and Guy C. Brown<sup>1,7,\*</sup>

<sup>1</sup>Department of Biochemistry, University of Cambridge, Cambridge CB2 1QW, UK

<sup>2</sup>Department of Biomedicine, School of Medicine, Institute of Neuroscience, University of Barcelona, 08036 Barcelona, Spain

<sup>3</sup>Neuroscience Institute, Lithuanian University of Health Sciences, 50009 Kaunas, Lithuania

<sup>4</sup>Neuroscience, Eli Lilly Research & Development, Windlesham, Surrey GU20 6PH, UK

<sup>5</sup>Clinical Neurosciences, University of Cambridge, Cambridge CB2 0QQ, UK

<sup>6</sup>These authors contributed equally

<sup>7</sup>Lead contact

\*Correspondence: [gcb3@cam.ac.uk](mailto:gcb3@cam.ac.uk)

<https://doi.org/10.1016/j.celrep.2021.110148>

## SUMMARY

Microglia are implicated in neurodegeneration, potentially by phagocytosing neurons, but it is unclear how to block the detrimental effects of microglia while preserving their beneficial roles. The microglial P2Y<sub>6</sub> receptor (P2Y<sub>6</sub>R) – activated by extracellular UDP released by stressed neurons – is required for microglial phagocytosis of neurons. We show here that injection of amyloid beta (Aβ) into mouse brain induces microglial phagocytosis of neurons, followed by neuronal and memory loss, and this is all prevented by knockout of P2Y<sub>6</sub>R. In a chronic tau model of neurodegeneration (P301S TAU mice), P2Y<sub>6</sub>R knockout prevented TAU-induced neuronal and memory loss. *In vitro*, P2Y<sub>6</sub>R knockout blocked microglial phagocytosis of live but not dead targets and reduced tau-, Aβ-, and UDP-induced neuronal loss in glial-neuronal cultures. Thus, the P2Y<sub>6</sub> receptor appears to mediate Aβ- and tau-induced neuronal and memory loss via microglial phagocytosis of neurons, suggesting that blocking this receptor may be beneficial in the treatment of neurodegenerative diseases.

## INTRODUCTION

There is growing evidence that excessive phagocytosis of neurons and/or neuronal parts by microglia may contribute to the brain pathology of neurodegenerative diseases, including Alzheimer's disease (AD) (Hong et al., 2016; Paolicelli et al., 2017; Butler et al., 2021), as well as aging (Shi et al., 2015; Linnartz-Gerlach et al., 2019). However, microglial phagocytosis of neurons, and thus neuronal cell bodies, is less well-established than phagocytosis of synapses, despite evidence that: microglia make more contact with cell bodies (Cserép et al., 2020), microglia remove neurons or neuronal precursors during development (Cunningham et al., 2013; Anderson et al., 2019), and microglia phagocytose stressed neurons after ischemia (Neher et al., 2013; Alawieh et al., 2018). Importantly, phagocytosis of live cells results in death of the engulfed cells, a type of cell death termed phagoptosis, i.e., cell death by phagocytosis (Brown and Neher, 2014). We and others have shown that microglia can cause neuronal loss and death by phagocytosis of stressed-but-viable neurons in some conditions (Brown and Neher, 2014; Neher et al., 2011; Brelstaff et al., 2018), but whether this contributes

to neurodegeneration is unknown (Fricker et al., 2018). Neuronal loss occurs relatively late in AD but correlates well with dementia (Andrade-Moraes et al., 2013). This suggests the possibility that blocking such neuronal loss (for example, by blocking microglial phagocytosis of stressed neurons) may stop or delay disease progression, even after diagnosis.

However, non-specific inhibition of microglial phagocytosis may be detrimental by blocking phagocytosis of dead cells, debris, protein aggregates, and/or pathogens. Indeed, most phagocytic receptors and opsonins recognize dead cells, debris, protein aggregates, and/or pathogens, so blocking such phagocytic receptors may be deleterious (Tay et al., 2018; Vilalta and Brown, 2018; Salter and Stevens, 2017; Gabandé-Rodríguez et al., 2020). However, the microglial P2Y<sub>6</sub> receptor (P2Y<sub>6</sub>R) is potentially a good target because it is activated by extracellular uridine diphosphate (UDP) released by stressed or damaged neurons (Koizumi et al., 2007), whereas dead cells, debris, or protein aggregates cannot release UDP, and therefore they are unlikely to be recognized by this receptor. P2Y<sub>6</sub>R is a G-protein-coupled receptor, encoded by the *P2ry6* gene, and within the brain is almost exclusively expressed by microglia (Koizumi

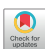

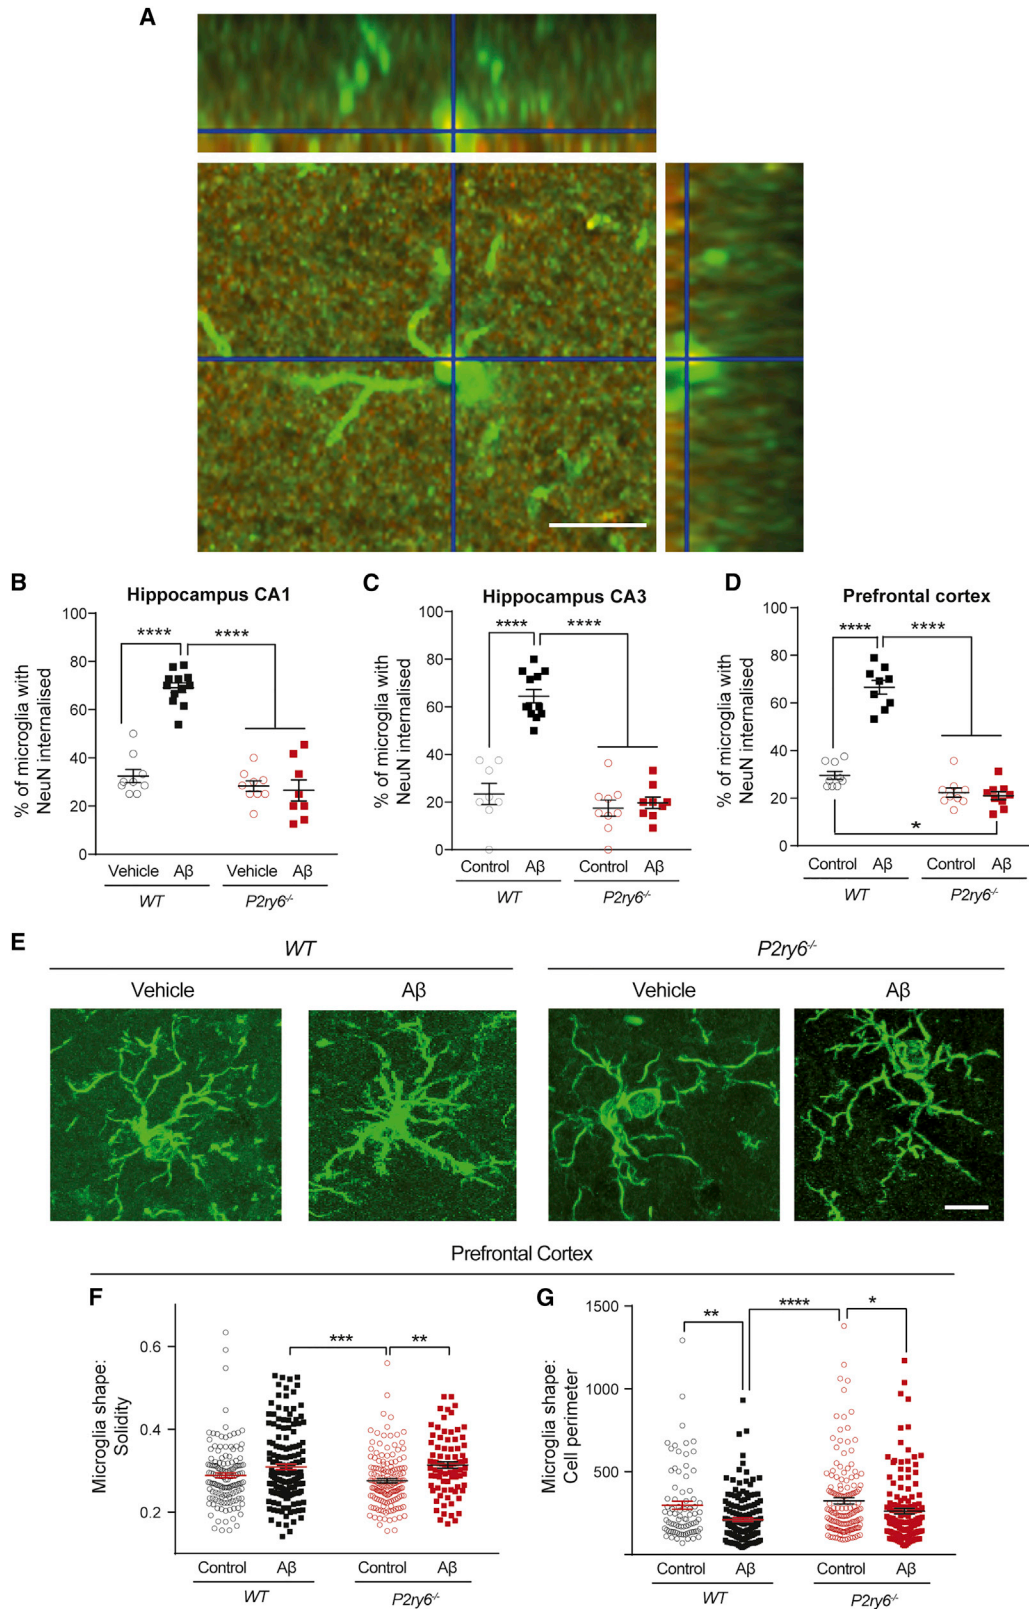

(legend on next page)

et al., 2007; Moore et al., 2001; Spangenberg et al., 2019). Microglial P2Y<sub>6</sub>R has been shown to mediate microglial phagocytosis *in vivo* and *in vitro*, and stressed/damaged neurons were shown to release uridine triphosphate (UTP) and UDP, which in turn activates P2Y<sub>6</sub>R on microglia, triggering the formation of the phagocytic cup (Koizumi et al., 2007). We previously found that an inhibitor of P2Y<sub>6</sub>R, N,N''-1,4-Butanediybis[N'-(3-isothiocyanatophenyl)thiourea (MRS2578), prevented neuronal loss induced by lipopolysaccharide (LPS) injected into brain or cell cultures of wild-type (WT) animals (Neher et al., 2014), but it remains unclear (1) whether this was actually mediated by P2Y<sub>6</sub>R, (2) whether P2Y<sub>6</sub>R inhibition is beneficial or detrimental, (3) whether P2Y<sub>6</sub>R mediates the phagocytosis of alive or dead cells/targets, and (4) whether neurodegeneration is mediated by P2Y<sub>6</sub>R-activated microglial phagocytosis. The work described here seeks to determine whether microglial phagocytosis contributes to neurodegeneration and whether this can be prevented by blocking the microglial P2Y<sub>6</sub> receptor.

## RESULTS

### P2ry6 knockout in mice prevents Aβ-induced microglial phagocytosis of neurons, neuronal loss, and memory deficits *in vivo*

To determine whether P2Y<sub>6</sub>R is involved in neurodegeneration, we used an acute amyloid model of AD (Prediger et al., 2007), known to feature excessive microglial phagocytosis (Hong et al., 2016). We stereotactically injected 400 pmol of aggregated amyloid beta (Aβ) into the right lateral ventricle of WT and P2ry6<sup>-/-</sup> mice, and three days later we measured microglial phagocytosis of neurons, quantified as the number of microglia containing neuronal nuclear (NeuN-positive) material in brain sections. Strikingly, we found that Aβ induced a three-fold increase in microglial phagocytosis of neurons in WT mice in all brain areas analyzed (Figures 1A–1D and S1). In contrast, Aβ injection induced no increase in NeuN-positive material inside microglia in P2ry6<sup>-/-</sup> mice (Figures 1A–1D). These findings indicate that Aβ injection induces microglial phagocytosis of neurons *in vivo* and that blocking P2Y<sub>6</sub>R is sufficient to prevent this.

To investigate whether P2Y<sub>6</sub>R affects microglial activation, we analyzed microglial density and morphology in the hippocampus and prefrontal cortex of WT and P2ry6<sup>-/-</sup> mice. Microglial density was not significantly altered by Aβ treatment in WT or P2ry6<sup>-/-</sup> mice, except in hippocampal area CA1, and P2Y<sub>6</sub>R knockout did not reduce microglial density in any area or condi-

tion (Figures S2A–S2C), indicating that any neuroprotection in P2ry6<sup>-/-</sup> mice is not due to having fewer microglia or less microglial proliferation. Aβ caused a mild, morphological activation of microglia (measured as increased microglial solidity and decreased perimeter), which was reduced by P2ry6<sup>-/-</sup> in CA1 but unaffected in CA3 and prefrontal cortex (Figures 1E–1G, S1O–S1R, and S2). Thus, P2ry6 knockout has little effect on Aβ-induced microglial activation as measured by microglial proliferation and morphology *in vivo*, consistent with our previous findings that P2Y<sub>6</sub>R inhibition has no effect on microglial activation as measured by release of cytokines and nitric oxide or isolectin B4 binding *in vivo* (Neher et al., 2014). To analyze this in more detail, we measured inflammatory cytokine release by cultured primary microglia from WT and P2ry6 knockout mice, treated ± lipopolysaccharide, using an ELISA array of 62 cytokines and chemokines. There were no significant differences in the LPS-induced fold change in release of any cytokine/chemokine between P2ry6<sup>+/+</sup> and P2ry6<sup>-/-</sup> microglia (Figure S3). These results confirm that P2ry6 knockout had little effect on microglial activation.

To determine whether microglial phagocytosis of neurons was associated with subsequent neuronal loss, we measured neuronal densities two weeks after Aβ injection. In WT mice, Aβ injection reduced neuronal density in the prefrontal cortex (Figures 2A, 2B, S4A, and S4D) and median and lateral parietal association cortex (Figure 2C). By contrast, Aβ caused no significant loss of cortical neurons in P2ry6<sup>-/-</sup> mice (Figures 2A–2C). Similarly, Aβ injection reduced the density and thickness of the CA1 and CA3 subfields of the hippocampus of WT mice, but not P2ry6<sup>-/-</sup> mice (Figures 2D–2G, S4A–S4C, and S4E). Altogether, these results indicate that Aβ-induced neuronal loss is mediated by P2Y<sub>6</sub>R.

Finally, because blocking microglial phagocytosis of neurons could be beneficial or detrimental for brain function, we tested whether blocking P2Y<sub>6</sub>R affected Aβ-induced memory deficits by evaluating novel-object recognition in the mice (Figures 2H and 2I). As expected, Aβ severely impaired novel-object recognition in WT mice (Figure 2I). However, Aβ had no significant effect on novel-object recognition in P2ry6<sup>-/-</sup> mice (Figure 2I), indicating that P2Y<sub>6</sub>R is required for the Aβ-induced memory impairment and blocking P2Y<sub>6</sub>R prevents the memory deficit.

Overall, these results indicate that P2ry6 knockout prevents the microglial phagocytosis of neurons, neuronal loss, and memory deficits induced by Aβ.

### Figure 1. Aβ injection induces microglial phagocytosis of neurons in wild-type but not P2ry6 knockout mice

Analysis of microglial phagocytosis of neuronal material by manual quantification of the percentage of Iba1-positive microglia with NeuN-positive material ingested in matched sections of hippocampus and prefrontal cortex following i.c.v. injection of Aβ or PBS (control) in wild-type (WT) and P2ry6 knockout (P2ry6<sup>-/-</sup>) mice.

(A) Representative X-Y, X-Z, and Y-Z projection of an Iba1-positive (green) microglial cell with NeuN-positive material (red) inside (overlap yellow). Scale bar: 10 μm.

(B–D) Percentage of microglia with NeuN material internalized in CA1 (B), CA3 (C), and prefrontal cortex (D).

(E) Representative image of Iba1<sup>+</sup> microglia in the hippocampal CA1 area. Scale bar, 10 μm.

(B–G) Automated quantification of microglia shape solidity and perimeter in the prefrontal cortex (F and G, respectively). Each data point represents one field of view (A–D) or one Iba1<sup>+</sup> cell (F and G).

Number of mice: WT-Aβ = 6, WT+Aβ = 6, KO-Aβ = 4, and KO+Aβ = 4. Error bars indicate mean ± SEM. Data were analyzed by two-way ANOVA with Tukey-corrected post hoc comparisons. \*p < 0.05, \*\*p < 0.01, \*\*\*p < 0.001, and \*\*\*\*p < 0.0001. For each graph, all genotypes were compared, and if there is no marker of significance on the graph, then any difference was not significant. See also Figures S1–S3.

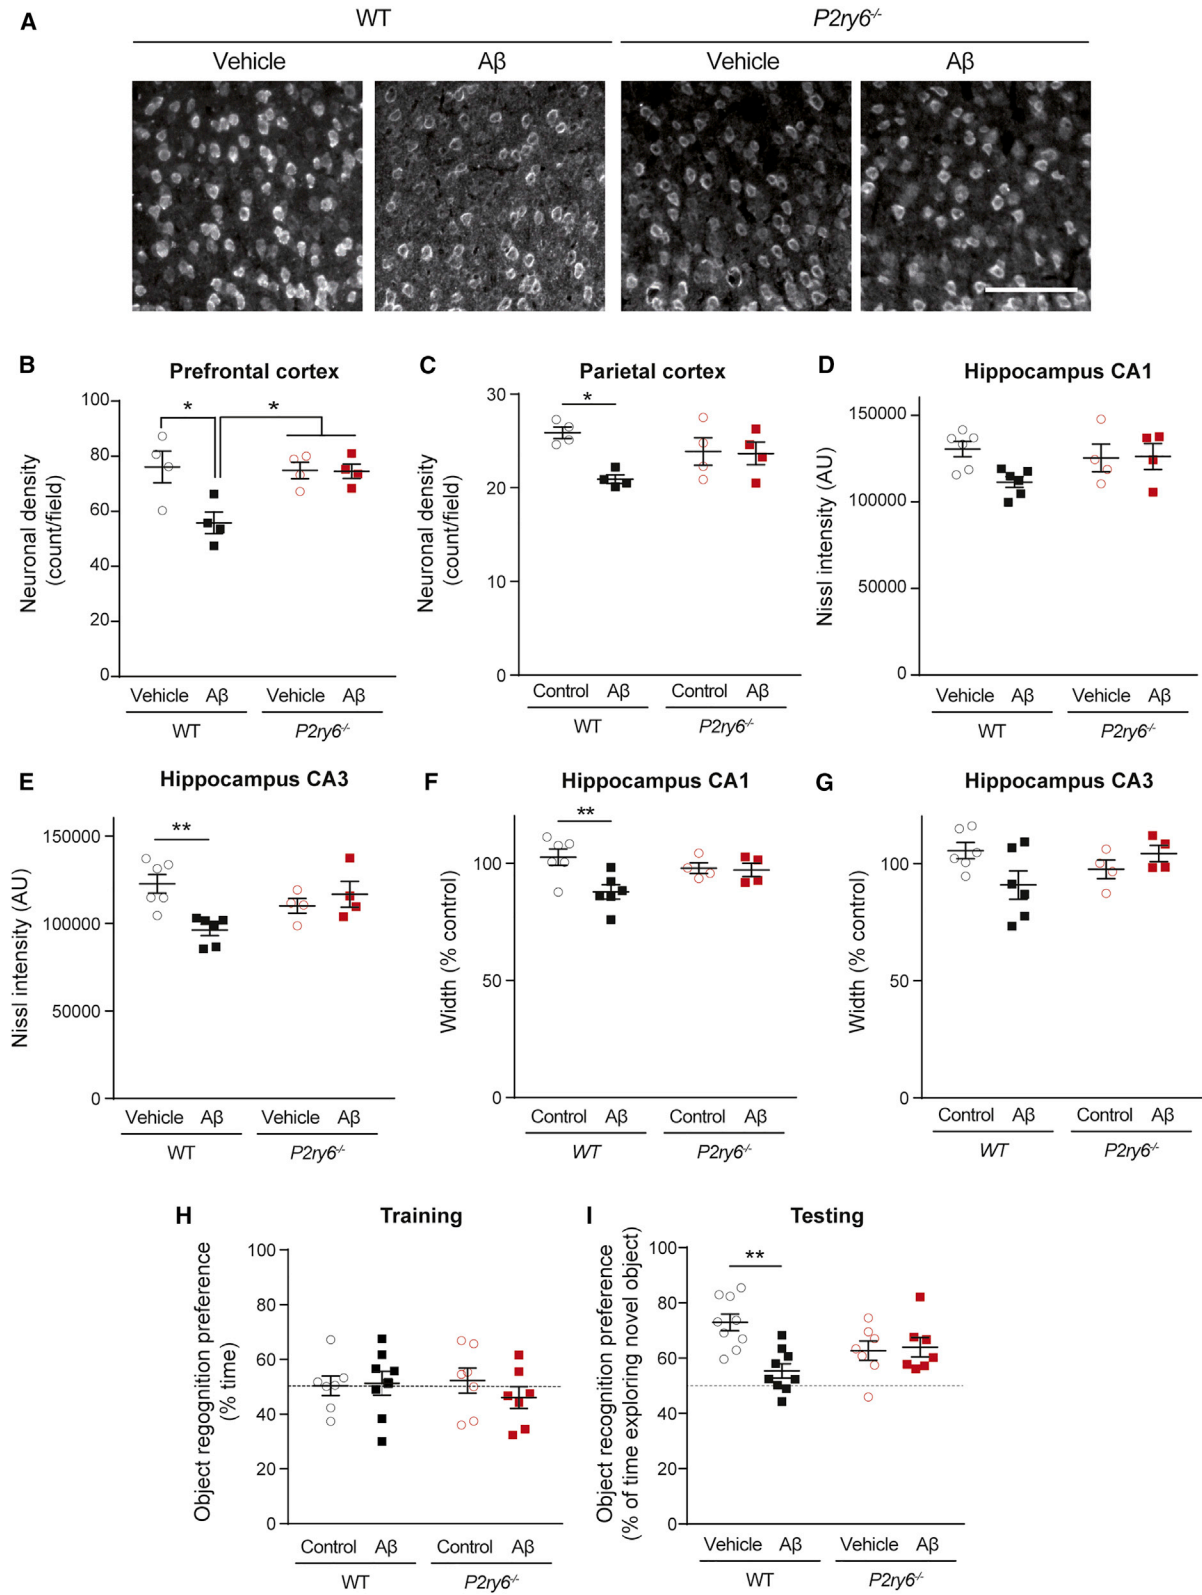

(legend on next page)

**P2ry6 knockout reduces neuronal loss and prevents memory deficits in a P301S TAU mouse model of neurodegeneration**

The above model of neurodegeneration is acute and amyloid-induced, whereas AD is chronic and appears to require tau pathology, which can be driven by pathways independent of A $\beta$  (van der Kant et al., 2020), so we next tested whether P2ry6 knockout is beneficial in a chronic model of tauopathy. To do this, we crossed P2ry6<sup>-/-</sup> mice with homozygous TgP301S mice expressing human mutant P301S tau specifically in neurons (recently rederived into a C57BL/6J background) (Figure S5A), which develop progressive tau aggregation, neuronal loss, and behavioral impairment (Allen et al., 2002; Hampton et al., 2010).

P301S mice lose cortical neurons (Hampton et al., 2010; Yang et al., 2015 & 2017), so we first tested whether genetic ablation of P2ry6 is sufficient to prevent the neuronal loss observed in the P301S mouse model at seven months of age. We found about 15% neuronal loss in the perirhinal cortex of P301S mice compared to WT mice (Figures 3A and 3B), similar to the loss previously reported (Yang et al., 2015, 2017). However, no significant neuronal loss was found in the perirhinal cortex of double-transgenic (P2ry6<sup>-/-</sup>:P301S<sup>+/+</sup>) mice compared to WT (P2ry6<sup>+/+</sup>:P301S<sup>-/-</sup>) mice (Figures 3A and 3B). Similarly, in the motor cortex, P301S mice had a lower neuronal density than WT mice (as previously shown in Hampton et al., 2010), but this neuronal loss was prevented in the double-transgenic mice (Figures 3C and 3D). These data indicated that the lack of P2ry6 reduced neuronal loss in P301S mice.

Given that neuronal loss in the perirhinal cortex, a brain region critical for object-recognition memory (Bartko et al., 2007; Mumby and Pinel, 1994), was previously found to associate with memory deficits in the P301S model (Yang et al., 2015, 2017), we next examined whether genetic ablation of P2ry6 is sufficient to prevent memory deficits in P301S mice. After confirming that there were no significant differences between genotypes at six months of age in body weight (Figure S5B), spontaneous locomotion (Figure S5C), anxiety-like behavior (Figures S5D–S5I), or exploration of objects during the training phase of the object-recognition test (Figure 3E), we next assessed memory performance by novel-object recognition 24 h after training. As expected, we found that P301S (P2ry6<sup>+/+</sup>:P301S<sup>+/+</sup>) mice had substantial deficits in recognition memory compared to WT (P2ry6<sup>+/+</sup>:P301S<sup>-/-</sup>) mice (Figure 3F). However, double-transgenic mice (P2ry6<sup>-/-</sup>:P301S<sup>+/+</sup>), expressing human mutant P301S tau but lacking P2ry6 expression, had no memory deficit compared to WT mice and substantially better memory than

P301S mice (Figure 3F), indicating that P2ry6 knockout prevented tau-induced memory deficits.

Given that our data demonstrate that genetic ablation of P2ry6 in homozygous TgP301S tau mice fully prevented the manifestation of memory deficits, we next explored whether the lack of P2ry6 could improve the severe spinal cord pathology exhibited by TgP301S mice (Allen et al., 2002). Thus, motor coordination, hindlimb claspings, gait, and kyphosis were examined at seven months of age, just before sacrificing the animals. We found that double-transgenic (P2ry6<sup>-/-</sup>:P301S<sup>+/+</sup>) mice had the same severe spinal cord pathology as P301S (P2ry6<sup>+/+</sup>:P301S<sup>+/+</sup>) mice (Figure S6), which suggests a different mechanism or severity of neurodegeneration in the spinal cord from the brain in this model of tauopathy.

**P2ry6 knockout prevents neuronal loss induced by tau, A $\beta$ , and UDP in glial-neuronal cultures**

To further investigate the underlying mechanisms by which P2Y<sub>6</sub>R is involved in neuronal loss, we used glial-neuronal cultures, isolated from brains of WT and P2Y<sub>6</sub>R knockout (P2ry6<sup>-/-</sup>) mice, and treated with tau or A $\beta$ . Both tau and A $\beta$  accumulate in the brains of individuals affected by AD and other neurodegenerative diseases (Chi et al., 2018; Sebastián-Serrano et al., 2018; Gallardo and Holtzman 2019). We have previously shown that tau and A $\beta$  induce neuronal loss in glial-neuronal cultures via microglial phagocytosis (Neher et al., 2011; Brelstaff et al., 2018; Pampuscenko et al., 2020, 2021), so we tested here whether this neuronal loss was mediated by P2Y<sub>6</sub>R. We found that the addition of extracellular tau protein (2N4R isoform) caused neuronal loss without inducing apoptosis or necrosis in mixed glial-neuronal cultures from WT mice (Figures 4A–4D). However, tau induced no significant neuronal loss in cultures from P2Y<sub>6</sub>R knockout (P2ry6<sup>-/-</sup>) mice (Figure 4C). Similarly, 1  $\mu$ M MRS2578 (a P2Y<sub>6</sub>R inhibitor) prevented tau-induced neuronal loss in WT cultures (Figure 4D), indicating that pharmacological inhibition of P2Y<sub>6</sub>R is as protective as P2ry6 knockout. A $\beta$  also induced neuronal loss in glial-neuronal cultures from WT mice, as previously reported (Yang et al., 2015), but this loss was reduced in glial-neuronal cultures from P2ry6<sup>-/-</sup> mice (Figure S7A).

P2Y<sub>6</sub>R is sensitively and selectively activated by extracellular UDP, so we tested whether UDP alone was sufficient to induce neuronal loss via P2Y<sub>6</sub>R. Addition of UDP to mixed glial-neuronal cultures from WT mice induced neuronal loss without any increase in neuronal apoptosis or necrosis (Figures 4E and 4F). However, UDP induced no neuronal loss in cultures from P2ry6<sup>-/-</sup> mice (Figures 4E and 4F). Thus, UDP activation of

**Figure 2. P2ry6 knockout mice are protected against A $\beta$ -induced neuronal loss and memory deficit**

- (A) Representative images of NeuN-positive staining of prefrontal cortex area 14 days after i.c.v. injection of A $\beta$ 1-40 (A $\beta$ ) or PBS (control) in WT and P2ry6 knockout (P2ry6<sup>-/-</sup>) mice. Scale bar: 100  $\mu$ m.
- (B and C) Quantification of NeuN-positive neuron densities of prefrontal cortex (B) and parietal cortex (C) in A $\beta$ -treated and control WT and knockout mice.
- (D and E) Quantification showing average Nissl intensity of CA1 (D) and CA3 (E) area per animal after background correction.
- (F and G) Average width of CA1 (F) and CA3 (G) area per animal, normalized to average WT control (100%). WT and P2ry6<sup>-/-</sup> mice were tested for novel-object recognition 14 days after i.c.v. injection of A $\beta$ 1-40 (A $\beta$ ) or PBS (control).
- (H) Percentage of time each animal spent exploring two identical objects during the training session of the NORT.
- (I) Novel-object recognition, 2-min retention interval. Dashed lines indicate a 50% chance level. Each data point represents one animal. Error bars indicate mean  $\pm$  SEM. Data were analyzed by two-way ANOVA with Tukey-corrected post hoc comparisons. \*p < 0.05 and \*\*p < 0.01. For each graph, all genotypes were compared, and if there is no marker of significance on the graph, then any difference was not significant. See also Figure S4.

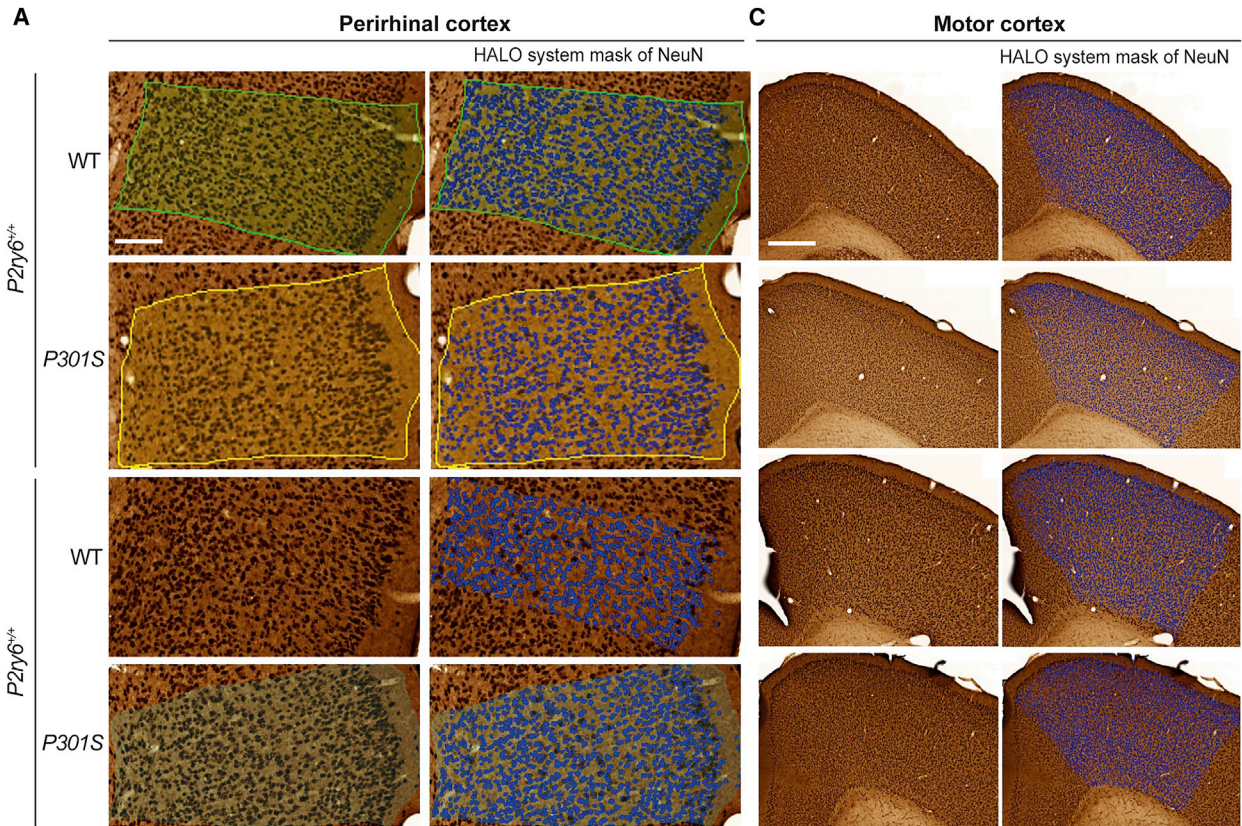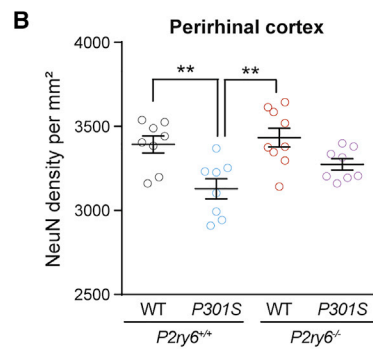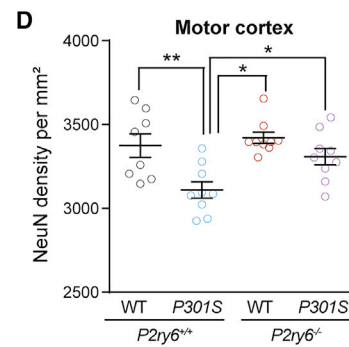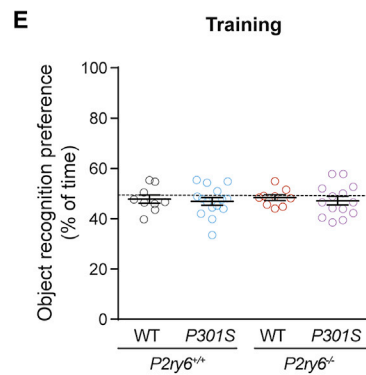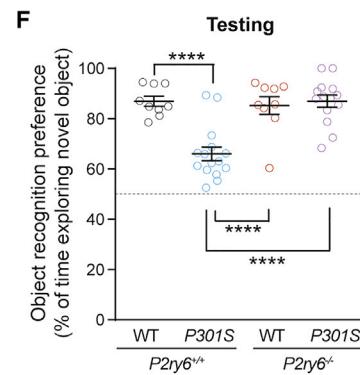

(legend on next page)

microglial P2Y<sub>6</sub>R is sufficient to induce neuronal loss, and knockout of the UDP receptor P2Y<sub>6</sub>R is sufficient to prevent neuronal loss induced by UDP, A $\beta$ , and tau.

### UDP/P2Y<sub>6</sub>R mediates phagocytosis of stressed-but-viable cells, but not debris or dead cells, *in vitro*

Our data indicate that blocking P2Y<sub>6</sub>R prevents neuronal loss induced by Tau and A $\beta$  both *in vitro* and *in vivo*, potentially by blocking microglial phagocytosis. However, it is unclear under what conditions and what targets may be phagocytosed via P2Y<sub>6</sub>R. To investigate this, we first compared phagocytosis of different targets by primary microglia from WT and *P2ry6*<sup>-/-</sup> mice and found that phagocytosis of beads (Figure 4G) and neuronal debris (Figure 4H) was not significantly different between the two genotypes.

We next used a model system of BV2 microglial cells phagocytosing PC12 (neuroendocrine) cells. UDP release from the PC12 cells was bioassayed using astrocytoma cells stably transfected with *P2ry6*. Stressing the PC12 cells by treatment with 250 nM A $\beta$  increased extracellular UDP levels (from 38  $\pm$  13 nM to 326  $\pm$  71 nM, *p* = 0.007), without inducing any PC12 cell death (Figure S7B). Importantly, when such A $\beta$ -stressed PC12 cells were incubated with BV2 cells, there was an increase in microglial phagocytosis of the PC12 cells that was prevented by inhibiting P2Y<sub>6</sub>R with MRS2578, whereas MRS2578 had no significant effect on the phagocytosis of untreated/unstressed PC12 cells (Figure S7C). In contrast, BV2 phagocytosis of necrotic PC12 cells (modeling “dead” cells), was unaffected by inhibiting P2Y<sub>6</sub>R with MRS2578 (Figure S7D). We repeated some of these experiments with primary microglia from WT mice (rather than BV-2 microglia) and found that inhibition of P2Y<sub>6</sub>R with MRS2578 prevented microglial phagocytosis of PC12 cells stressed with 250 nM A $\beta$ , but MRS2578 did not inhibit phagocytosis of unstressed PC12 cells (Figure 4I). Thus, our data indicate that P2Y<sub>6</sub>R mediates the phagocytosis of stressed-but-viable cells, but not the phagocytosis of healthy cells, dead cells, cellular debris, or inert beads. This is consistent with UDP being released from stressed cells (Koizumi et al., 2007; Giuliani et al., 2019), but not from necrotic cells or debris, as these contain no UDP because their membranes are ruptured.

## DISCUSSION

Neuronal loss occurs mainly after diagnosis of Alzheimer’s disease and correlates with dementia symptoms (Andrade-Moraes et al., 2013). Thus, it is possible that dementia progression may

be stopped after AD diagnosis by blocking such neuronal loss. In this study, we found that *P2ry6* knockout prevented neuronal loss induced by UDP, Tau, and A $\beta$  in glial-neuronal cultures. We have previously shown that this neuronal loss induced by UDP, Tau, and A $\beta$  is mediated by microglial phagocytosis of stressed-but-viable neurons (Neher et al., 2011 & 2014; Brelstaff et al., 2018; Pampuscenko et al., 2020), and the results here indicate this is mediated by the engulfment receptor P2Y<sub>6</sub>R. In addition, we show here that blocking P2Y<sub>6</sub>R does not inactivate phagocytosis generally (there is no inhibition of phagocytosis of beads or neuronal debris) but does reduce phagocytosis of stressed cells. One explanation of this specificity is that stressed cells contain UDP that can be released to activate P2Y<sub>6</sub>R (Koizumi et al., 2007), whereas beads and debris (with ruptured membranes) contain no UDP and therefore cannot activate P2Y<sub>6</sub>R to induce engulfment. Most phagocytic receptors, such as Mer tyrosine kinase, Axl, TyroB, triggering receptor expressed on myeloid cells 2 (TREM2), TIM4, BAI1, complement receptor 3, and the vitronectin receptor, recognize dead or dying cells, debris, protein aggregates, and/or pathogens, so that chronic inhibition can be detrimental (Cser ep et al., 2020; Tay et al., 2018; Vilalta and Brown 2018; Salter and Stevens 2017). As P2Y<sub>6</sub>R is specifically activated by UDP, it may help discriminate stressed-but-viable cells from dead cells and debris and thus may be a better treatment target to block excessive microglial phagocytosis.

To test whether P2Y<sub>6</sub>R inactivation is beneficial in a chronic model of neurodegeneration we used P301S TAU mice, which develop tauopathy, neuronal loss, and memory loss (Allen et al., 2002). We crossed *P2ry6*<sup>-/-</sup> mice with P301S TAU mice and found that P2Y<sub>6</sub>R inactivation partially prevented the tau-induced memory and neuronal loss. Note, however, that the severe spinal cord pathology present in P301S TAU knockin mice was not ameliorated by inactivation of P2Y<sub>6</sub>R, indicating that the aggressive spinal cord pathology in this model is not mediated by P2Y<sub>6</sub>R. Nevertheless, the prevention of brain pathology by *P2ry6* knockout at a late stage in this model is impressive, indicating an important role for P2Y<sub>6</sub>R in the observed neurodegeneration. This is consistent with culture experiments (Brelstaff et al., 2018) showing that neurons with TAU filaments (cultured from P301S TAU mice) were preferentially phagocytosed by isolated microglia, resulting in neuronal death by phagocytosis; i.e., the neurons with TAU aggregates died by phagocytosis. Moreover, given the absence of apoptosis or necrosis in the P301S TAU knockin mice (Allen et al., 2002), our results suggest that phagocytosis (i.e., cell death by phagocytosis) may be a key

### Figure 3. P301S tau mice have cortical neuron loss and memory deficit prevented by crossing with *P2ry6* knockout mice

WT and *P2ry6*<sup>-/-</sup> mice were crossed with P301S tau mice, aged, and tested at six months.

(A) Representative coronal section of perirhinal cortex immunostained for NeuN and nuclei identified by HALO system. Scale bar: 100 $\mu$ m.

(B) Quantification of neuronal density within the perirhinal cortex.

(C) Representative coronal section of motor cortex immunostained for NeuN and nuclei identified by HALO system. Scale bar: 500 $\mu$ m.

(D) Quantification of neuronal density within the motor cortex. Data = mean  $\pm$  SEM (5–6 slices/animal, *n* = 8–9 animals per genotype). Statistical analysis was two-way ANOVA with post hoc Tukey’s multiple comparison test. \**p* < 0.05, \*\**p* < 0.01, and \*\*\**p* < 0.001. At six months of age, mice were tested for novel-object recognition (NORT, testing 24 h after training).

(E) Percentage of time each animal spent exploring two identical objects during the training session of the NORT.

(F) Novel-object recognition, 24 h after training. Dashed lines indicate a 50% chance level. Each data point represents one animal, and error bars represent mean  $\pm$  SEM. Data were analyzed by two-way ANOVA with Tukey-corrected post hoc comparisons. \*\*\*\**p* < 0.0001. For each graph, all genotypes were compared, and if there is no marker of significance on the graph, then any difference was not significant. See also Figures S5, S6, and S8.



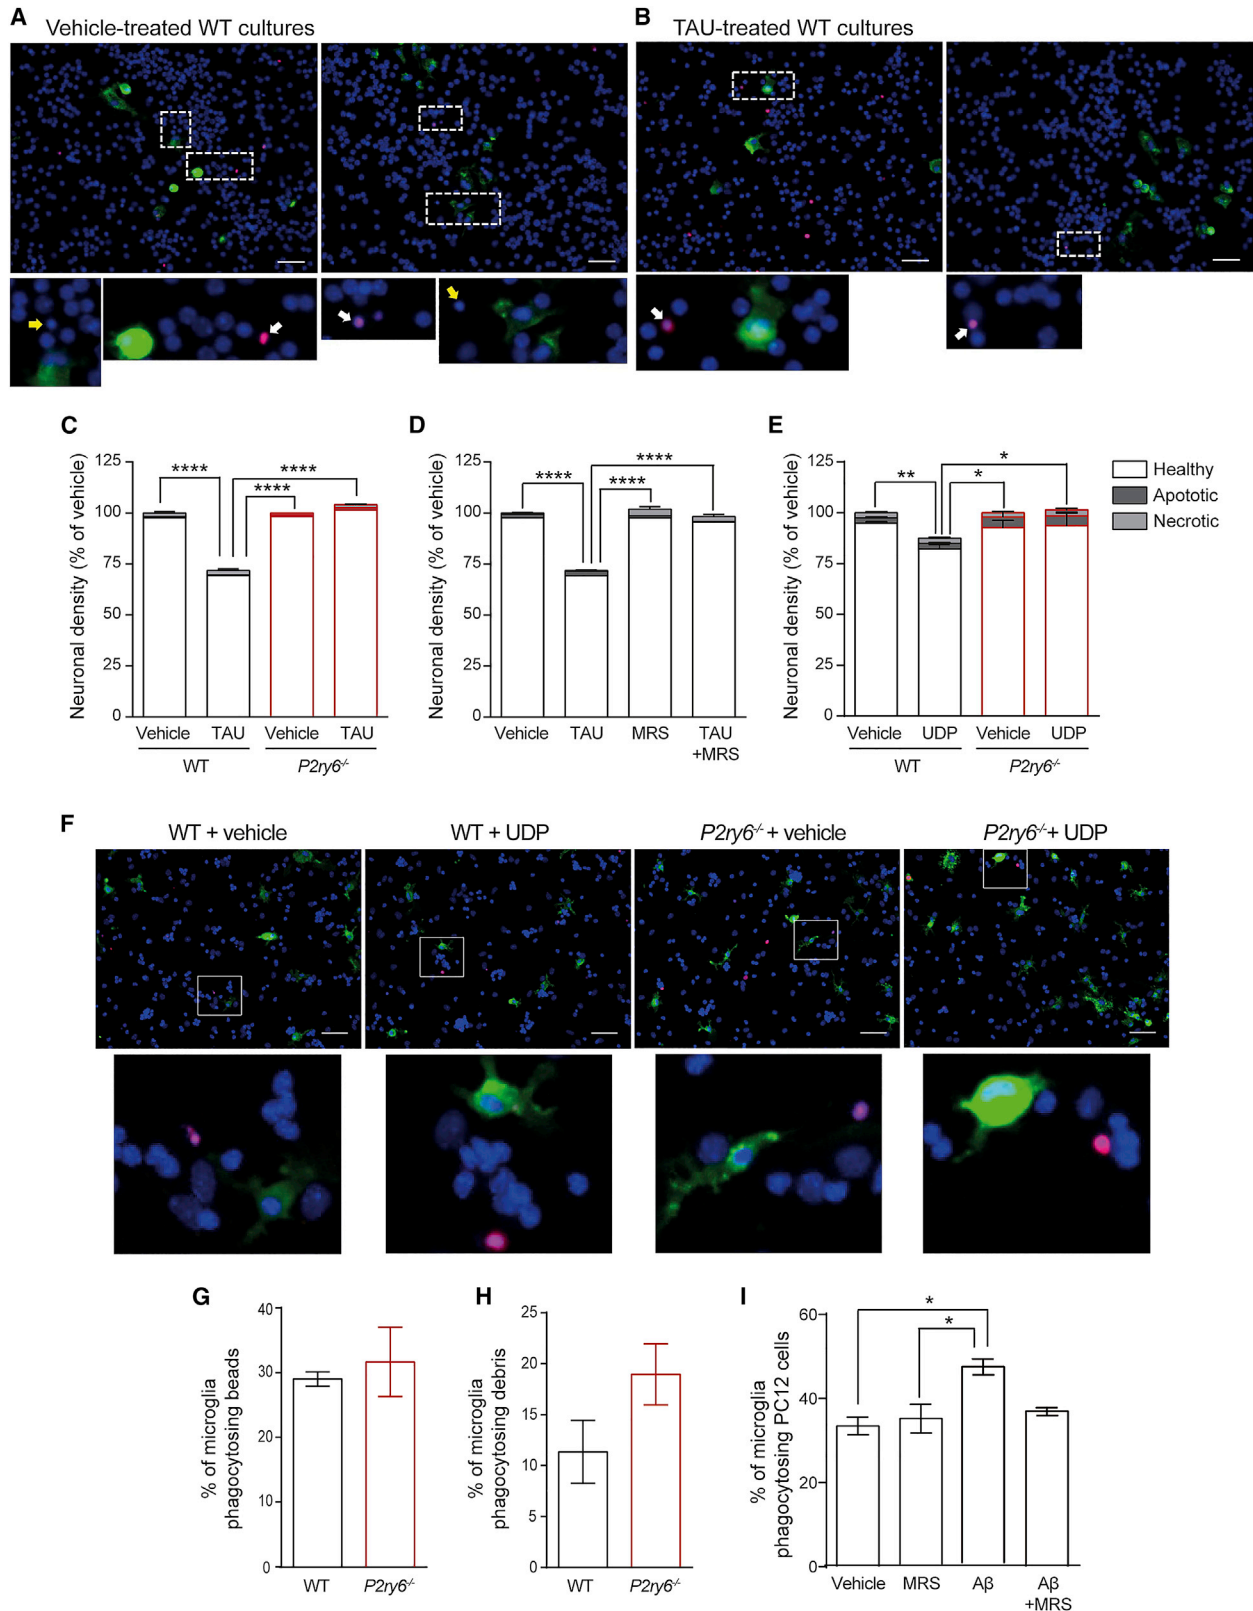

(legend on next page)

mechanism of brain neuronal death in this model of chronic neurodegeneration.

As *P2ry6* knockout prevented A $\beta$ -induced neuronal loss *in vitro*, and the A $\beta$  injection *in vivo* model is known to feature excessive microglial phagocytosis, we tested whether *P2ry6* knockout affected A $\beta$ -induced neuronal loss in this model and whether microglial phagocytosis of neuronal material contributes to such loss. We found that WT mice injected with A $\beta$  lost neurons in the hippocampus and cortex and performed significantly worse in a learning and memory task (novel-object recognition), consistent with previous studies using the same model (Prediger et al., 2007). Our novel observation that *P2ry6*<sup>-/-</sup> mice were protected against the memory impairment and neuronal loss induced by A $\beta$  suggests that P2Y<sub>6</sub>R signaling may be involved in the neuronal loss associated with the amyloid pathology of AD. Importantly, we found that A $\beta$  induced a large increase in the proportion of microglia containing NeuN<sup>+</sup> neuronal material, and this increase was entirely prevented in *P2ry6*<sup>-/-</sup> mice. It is possible, but unlikely, that NeuN<sup>+</sup> puncta enter microglia by processes other than phagocytosis at the time that NeuN<sup>+</sup> neurons are lost. Thus, A $\beta$  appeared to induce microglial phagocytosis of neurons, and this was prevented by *P2ry6* knockout.

Interestingly, *P2ry6* knockout did not prevent the morphological activation of microglia after A $\beta$  treatment *in vivo* and had minimal effects on cytokine and chemokine release *in vitro*, consistent with the previous findings by us and others that microglial activation and cytokine release is not affected by inhibition of P2Y<sub>6</sub>R (Neher et al., 2014; Wen et al., 2020). Together, these findings suggest that *P2ry6* knockout prevents A $\beta$ -induced neuronal loss by preventing microglial phagocytosis of neurons rather than by preventing microglial activation itself. Although we lack *in vivo* evidence of microglial phagocytosis of specifically live neurons, which is not currently possible to image *in vivo*, our results suggest that, in WT mice, A $\beta$  treatment causes microglia to phagocytose otherwise viable neurons, as *P2ry6* knockout prevents the observed increase in microglial phagocytosis of neurons three days after A $\beta$  treatment, resulting in viable neurons left behind two weeks later and improved brain function as measured by novel object recognition. This suggests that in WT animals, the neurons were alive when phagocytosed by microglia. UDP is released from stressed neurons and activates formation of the phagocytic cup, driving engulfment (Koizumi et al., 2007). Importantly, this could mean that P2Y<sub>6</sub>R is part of

a final common pathway of neuronal engulfment under multiple inflammatory conditions.

In the mouse brain, the P2Y<sub>6</sub> receptor is mainly, but not exclusively, expressed in microglia (Moore et al., 2001; Spangenberg et al., 2019); its expression has also been found in neurons of the arcuate nucleus of the hypothalamus (Steculorum et al., 2015), in peripheral macrophages (Garcia et al., 2014), and dendritic cells (Li et al., 2020). Thus, we cannot rule out that some of the effects observed in our study partially involved the role of P2Y<sub>6</sub>R on these other cell populations. However, quantitatively this contribution is likely to be small. Similarly, we cannot rule out that the P2Y<sub>6</sub> receptor is involved in regulating other cellular processes, such as autophagy, but P2Y<sub>6</sub>R is not known to regulate any relevant process other than phagocytosis, and its role in microglial phagocytosis appears sufficient to explain the effects seen here.

We conclude that the P2Y<sub>6</sub> receptor contributes to neurodegeneration induced by A $\beta$  and TAU at least in part by microglial phagocytosis of neurons. Overall, our findings suggest a model in which UDP released from stressed-but-viable neurons contributes to neuronal loss under inflammatory conditions by promoting phagocytosis of otherwise viable neurons via P2Y<sub>6</sub>R (see graphical abstract, created with BioRender, for proposed model). The finding that neuronal death during neurodegeneration is at least partially mediated by microglial phagocytosis provides new perspectives on the nature of neurodegeneration and how to prevent it. In particular, as the neurodegeneration of AD is thought to be induced by A $\beta$  and TAU, and *P2ry6* knockout prevented neuronal loss induced by these factors in mice, P2Y<sub>6</sub>R inhibition might be beneficial in Alzheimer's patients. Thus, our study encourages the development of safe and clinically applicable P2Y<sub>6</sub>R antagonists to block microglial phagocytosis of stressed-but-viable neurons, which might prevent memory deficits and neuronal loss in neurodegenerative diseases and other brain pathologies.

#### Limitations of the study

This paper has the following general limitations: the experiments were done in mice, mouse cells, and mouse models of human disease, so we do not know that the results will extrapolate to humans and human disease. The *P2ry6* knockout was in all cells, rather than microglia specifically, so we do not know that the effects were due to microglia exclusively. *P2ry6* knockout might affect unknown processes (other than microglial phagocytosis) that impact pathology. We have not directly measured microglial

#### Figure 4. *P2ry6* knockout protects from neuronal loss induced by TAU and UDP in glial/neuronal cultures and reduces microglial phagocytosis of stressed cells, but not phagocytosis of beads or debris

(A–F) Mixed neuronal-glia cultures from cerebella of WT or *P2ry6* knockout (*P2ry6*<sup>-/-</sup>) mice were treated for 3 days with  $\pm 3 \mu\text{M}$  tau (A and C),  $3 \mu\text{M}$  tau  $\pm 1 \mu\text{M}$  MRS2578 (D), or  $100 \mu\text{M}$  UDP (E and F), then density of necrotic, apoptotic, and healthy neurons was counted. Scale bar: 50 microns. (A and F) Representative images (upper panels) and corresponding insets (bottom panels) showing microglia (IB4, green), PI (as a necrotic marker, red), and nuclei (Hoechst, blue) staining in (A) mixed neuronal-glia cerebellar cultures from WT mice treated  $\pm 3 \mu\text{M}$  tau, or (F) mixed neuronal-glia cerebellar cultures from WT and *P2ry6*<sup>-/-</sup> treated  $\pm 100 \mu\text{M}$  UDP. Apoptotic neurons (yellow arrows) can be seen as smaller Hoechst-positive nuclei (due to nuclear condensation), and necrotic neurons (white arrows) are stained with PI (red). Notice that apoptotic and necrotic neurons are very rare in these conditions. Data = mean  $\pm$  SEM (N = 3 independent experiments; each experiment in triplicate). Data were analyzed by two-way ANOVA with Tukey-corrected post hoc comparisons. \*p < 0.05 \*\*p < 0.01, and \*\*\*\*p < 0.0001.

(G and H) Percentage of microglia isolated from WT or *P2ry6*<sup>-/-</sup> mice phagocytosing 5-micron beads (G) and neuronal debris (H).

(I) Percentage of microglia phagocytosing PC12 cells  $\pm 500 \text{ nM}$  A $\beta$   $\pm 1 \mu\text{M}$  MRS2578. n = 3–5 independent experiments for each. Data = mean  $\pm$  SEM. Data were analyzed by two-way ANOVA with post hoc Tukey's multiple comparison test (I) and two-sample t test (G and H). \*p < 0.05. For each graph, all treatments/genotypes were compared, and if there is no marker of significance on the graph, then any difference was not significant. See also Figure S7.

phagocytosis of neurons or determined whether neurons are phagocytosed alive by microglia. Examining additional phagocytic markers would have been useful to determine whether the neuronal nuclei within microglia colocalized with lysosomes.

## STAR★METHODS

Detailed methods are provided in the online version of this paper and include the following:

- **KEY RESOURCES TABLE**
- **RESOURCE AVAILABILITY**
  - Lead contact
  - Materials availability
  - Data and code availability
- **EXPERIMENTAL MODEL AND SUBJECT DETAILS**
  - Mice
  - Generation of double transgenic **P2ry6**<sup>-/-</sup>; P301S<sup>+/+</sup> mice
  - Primary cell cultures
  - BV2 and PC12 cell cultures
  - Human astrocytoma cell line 1321N1
- **METHOD DETAILS**
  - Primary cell culture experiments
  - Microglial phagocytosis of beads and neuronal debris
  - Cytokine and chemokine release from microglia
  - BV2 and PC12 experiments
  - Bioassay of UDP concentrations using P2Y<sub>6</sub> receptors transfected astrocytoma cells
  - Intracerebroventricular injection of Aβ1-40
  - Novel object recognition test (NORT) and spontaneous locomotor activity
  - Motor coordination
  - Transcardial perfusion and tissue sectioning
  - Nissl staining
  - Immunostaining of non-free-floating brain slices
  - Image analysis using ImageJ 1.49 software
  - Immunostaining of free-floating brain slices
  - Image analysis of free-floating brain slices' immunostaining
- **QUANTIFICATION AND STATISTICAL ANALYSIS**
  - Statistical analysis

## SUPPLEMENTAL INFORMATION

Supplemental information can be found online at <https://doi.org/10.1016/j.celrep.2021.110148>.

## ACKNOWLEDGMENTS

We are grateful to Gregory Strachan for their technical support. We thank Dr. Michel Goedert for the TgP301S tau mice. We thank Bernard Robaye for the P2Y<sub>6</sub>R knockout mice. This work was supported by the Medical Research Council UK (MR/L010593), Alzheimer's Research UK (Dementia Consortium grant ARUK-DC2017-4, Network grant G-102212), Eli Lilly (ARUK-DC2017-4), LifeArc (ARUK-DC2017-4), and Wellcome Trust (Disease Model Core Imaging Award 208363/Z/17/Z). This project has received funding from the Innovative Medicines Initiative 2 Joint Undertaking under grant agreement No. 115976. This Joint Undertaking receives support from the European Union's Horizon 2020 research and innovation program and EFPIA.

## AUTHOR CONTRIBUTIONS

M.P., S.M., A.V., T.C., D.H.A., K.P., J.L., J.M.D., and J.H.B. performed and analyzed experiments in culture or on brain sections. M.P. and S.M. performed and analyzed experiments *in vivo*. M.P., S.M., V.B., H.N.N., M.G.S., and G.B. planned and analyzed experiments. G.B. conceived and managed the research. M.P. prepared the figures. M.P., S.M., and G.C.B. wrote the manuscript. All authors reviewed and approved the manuscript.

## DECLARATION OF INTERESTS

The authors declare no competing interests.

Received: April 16, 2021

Revised: October 1, 2021

Accepted: November 29, 2021

Published: December 28, 2021

## REFERENCES

- Alawieh, A., Langley, E.F., and Tomlinson, S. (2018). Targeted complement inhibition salvages stressed neurons and inhibits neuroinflammation after stroke in mice. *Sci. Transl. Med.* *10*, eaa06459. <https://doi.org/10.1126/scitranslmed.aao6459>.
- Allen, B., Ingram, E., Takao, M., Smith, M.J., Jakes, R., Virdee, K., Yoshida, H., Holzer, M., Craxton, M., Emson, P.C., et al. (2002). Abundant tau filaments and nonapoptotic neurodegeneration in transgenic mice expressing human P301S tau protein. *J. Neurosci.* *22*, 9340–9351. <https://doi.org/10.1523/JNEUROSCI.22-21-09340.2002>.
- Anderson, S.R., Zhang, J., Steele, M.R., Romero, C.O., Kautzman, A.G., Schaffer, D.P., and Vetter, M.L. (2019). Complement Targets Newborn Retinal Ganglion Cells for Phagocytic Elimination by Microglia. *J. Neurosci.* *39*, 2025–2040. <https://doi.org/10.1523/JNEUROSCI.1854-18.2018>.
- Andrade-Moraes, C.H., Oliveira-Pinto, A.V., Castro-Fonseca, E., da Silva, C.G., Guimarães, D.M., Szczupak, D., Parente-Bruno, D.R., Carvalho, L.R., Polichiso, L., Gomes, B.V., et al. (2013). Cell number changes in Alzheimer's disease relate to dementia, not to plaques and tangles. *Brain* *136*, 3738–3752. <https://doi.org/10.1093/brain/awt273>.
- Bartko, S.J., Winters, B.D., Cowell, R.A., Saksida, L.M., and Bussey, T.J. (2007). Perceptual functions of perirhinal cortex in rats: zero-delay object recognition and simultaneous oddity discriminations. *J. Neurosci.* *27*, 2548–2559. <https://doi.org/10.1523/JNEUROSCI.5171-06.2007>.
- Brelstaff, J., Tolkovsky, A.M., Ghetti, B., Goedert, M., and Spillantini, M.G. (2018). Living Neurons with Tau Filaments Aberrantly Expose Phosphatidylerine and Are Phagocytosed by Microglia. *Cell Rep* *24*, 1939–1948.e4. <https://doi.org/10.1016/j.celrep.2018.07.072>.
- Brown, G.C., and Neher, J.J. (2014). Microglial phagocytosis of live neurons. *Nat. Rev. Neurosci.* *15*, 209–216. <https://doi.org/10.1038/nrn3710>.
- Butler, C.A., Popescu, A.S., Kitchener, E.J.A., Allendorf, D.H., Puigdellívol, M., and Brown, G.C. (2021). Microglial phagocytosis of neurons in neurodegeneration, and its regulation. *J. Neurochem.* *158*, 621–639. <https://doi.org/10.1111/jnc.15327>.
- Carrillo-Jimenez, A., Puigdellívol, M., Vilalta, A., Venero, J.L., Brown, G.C., StGeorge-Hyslop, P., and Burguillos, M.A. (2018). Effective Knockdown of Gene Expression in Primary Microglia With siRNA and Magnetic Nanoparticles Without Cell Death or Inflammation. *Front. Cell. Neurosci.* *12*, 313. <https://doi.org/10.3389/fncel.2018.00313>.
- Chi, H., Chang, H.Y., and Sang, T.K. (2018). Neuronal Cell Death Mechanisms in Major Neurodegenerative Diseases. *Int. J. Mol. Sci.* *19*, 3082. <https://doi.org/10.3390/ijms19103082>.
- Cserép, C., Pósfai, B., Lénárt, N., Fekete, R., László, Z.I., Lele, Z., Orsolits, B., Molnár, G., Heindl, S., Schwarcz, A.D., et al. (2020). Microglia monitor and protect neuronal function through specialized somatic purinergic junctions. *Science* *367*, 528–537.

- Cunningham, C.L., Martínez-Cerdeño, V., and Noctor, S.C. (2013). Microglia regulate the number of neural precursor cells in the developing cerebral cortex. *J. Neurosci.* **33**, 4216–4233.
- Fricker, M., Oliva-Martín, M.J., and Brown, G.C. (2012). Primary phagocytosis of viable neurons by microglia activated with LPS or A $\beta$  is dependent on calcitriol/LRP phagocytic signalling. *J. Neuroinflammation* **9**, 196. <https://doi.org/10.1186/1742-2094-9-196>.
- Fricker, M., Tolkovsky, A.M., Borutaite, V., Coleman, M., and Brown, G.C. (2018). Neuronal Cell Death. *Physiol. Rev.* **98**, 813–880. <https://doi.org/10.1152/physrev.00011.2017>.
- Gabandé-Rodríguez, E., Keane, L., and Capasso, M. (2020). Microglial phagocytosis in aging and Alzheimer's disease. *J. Neurosci. Res.* **98**, 284–298.
- Gallardo, G., and Holtzman, D.M. (2019). Amyloid- $\beta$  and Tau at the Crossroads of Alzheimer's Disease. *Adv. Exp. Med. Biol.* **1184**, 187–203.
- García, R.A., Yan, M., Search, D., Zhang, R., Carson, N.L., Ryan, C.S., Smith-Monroy, C., Zheng, J., Chen, J., Kong, Y., et al. (2014). P2Y6 receptor potentiates pro-inflammatory responses in macrophages and exhibits differential roles in atherosclerotic lesion development. *PLoS One* **9**, e111385.
- Giralt, A., Puigdel·l·ivol, M., Carretón, O., Paoletti, P., Valero, J., Parra-Damas, A., Saura, C.A., Alberch, J., and Ginés, S. (2012). Long-term memory deficits in Huntington's disease are associated with reduced CBP histone acetylase activity. *Hum. Mol. Genet.* **21**, 1203–1216.
- Giuliani, A.L., Sarti, A.C., and Di Virgilio, F. (2019). Extracellular nucleotides and nucleosides as signalling molecules. *Immunol. Lett.* **205**, 16–24.
- Guyenet, S.J., Furrer, S.A., Damian, V.M., Baughan, T.D., La Spada, A.R., and Garden, G.A. (2010). A simple composite phenotype scoring system for evaluating mouse models of cerebellar ataxia. *J. Vis. Exp.* **1787**, 1787. <https://doi.org/10.3791/1787>.
- Hampton, D.W., Webber, D.J., Bilican, B., Goedert, M., Spillantini, M.G., and Chandran, S. (2010). Cell-mediated neuroprotection in a mouse model of human tauopathy. *J. Neurosci.* **30**, 9973–9983.
- Hong, S., Beja-Glasser, V.F., Nfonoyim, B.M., Frouin, A., Li, S., Ramakrishnan, S., Merry, K.M., Shi, Q., Rosenthal, A., Barres, B.A., et al. (2016). Complement and microglia mediate early synapse loss in Alzheimer mouse models. *Science* **352**, 712–716. <https://doi.org/10.1126/science.aad8373>.
- Koizumi, S., Shigemoto-Mogami, Y., Nasu-Tada, K., Shinozaki, Y., Ohsawa, K., Tsuda, M., Joshi, B.V., Jacobson, K.A., Kohsaka, S., and Inoue, K. (2007). UDP acting at P2Y6 receptors is a mediator of microglial phagocytosis. *Nature* **446**, 1091–1095. <https://doi.org/10.1038/nature05704>.
- Li, Z., He, C., Zhang, J., Zhang, H., Wei, H., Wu, S., and Jiang, W. (2020). P2Y<sub>6</sub> Deficiency Enhances Dendritic Cell-Mediated Th1/Th17 Differentiation and Aggravates Experimental Autoimmune Encephalomyelitis. *J. Immunol.* **205**, 387–397.
- Linnartz-Gerlach, B., Bodea, L.G., Klaus, C., Ginolhac, A., Halder, R., Sinkkonen, L., Walter, J., Colonna, M., and Neumann, H. (2019). TREM2 triggers microglial density and age-related neuronal loss. *Glia* **67**, 539–550.
- Moore, D.J., Chambers, J.K., Wahlin, J.P., Tan, K.B., Moore, G.B., Jenkins, O., Emson, P.C., and Murdock, P.R. (2001). Expression pattern of human P2Y receptor subtypes: a quantitative reverse transcription-polymerase chain reaction study. *Biochim. Biophys. Acta* **1527**, 107–119.
- Mummy, D.G., and Pinel, J.P. (1994). Rhinal cortex lesions and object recognition in rats. *Behav. Neurosci.* **108**, 11–18.
- Neher, J.J., Neniskyte, U., Zhao, J.W., Bal-Price, A., Tolkovsky, A.M., and Brown, G.C. (2011). Inhibition of microglial phagocytosis is sufficient to prevent inflammatory neuronal death. *J. Immunol.* **186**, 4973–4983. <https://doi.org/10.4049/jimmunol.1003600>.
- Neher, J.J., Emmrich, J.V., Fricker, M., Mander, P.K., Théry, C., and Brown, G.C. (2013). Phagocytosis executes delayed neuronal death after focal brain ischemia. *Proc. Natl. Acad. Sci. U S A* **110**, E4098–E4107. <https://doi.org/10.1073/pnas.1308679110>.
- Neher, J.J., Neniskyte, U., Hornik, T., and Brown, G.C. (2014). Inhibition of UDP/P2Y6 purinergic signaling prevents phagocytosis of viable neurons by activated microglia in vitro and in vivo. *Glia* **62**, 1463–1475. <https://doi.org/10.1002/glia.22693>.
- Pampuscenko, K., Morkuniene, R., Sneideris, T., Smirnovas, V., Budvytyte, R., Valincius, G., Brown, G.C., and Borutaite, V. (2020). Extracellular tau induces microglial phagocytosis of living neurons in cell cultures. *J. Neurochem.* **154**, 316–329. <https://doi.org/10.1111/jnc.14940>.
- Pampuscenko, K., Morkuniene, R., Krasauskas, L., Smirnovas, V., Tomita, T., and Borutaite, V. (2021). Distinct Neurotoxic Effects of Extracellular Tau Species in Primary Neuronal-Glial Cultures. *Mol. Neurobiol.* **58**, 658–667. <https://doi.org/10.1007/s12035-020-02150-7>.
- Paolicelli, R.C., Jawaid, A., Henstridge, C.M., Valeri, A., Merlini, M., Robinson, J.L., Lee, E.B., Rose, J., Appel, S., Lee, V.M., et al. (2017). TDP-43 Depletion in Microglia Promotes Amyloid Clearance but Also Induces Synapse Loss. *Neuron* **95**, 297–308.e6.
- Prediger, R.D., Franco, J.L., Pandolfo, P., Medeiros, R., Duarte, F.S., Di Giunta, G., Figueiredo, C.P., Farina, M., Calixto, J.B., Takahashi, R.N., and Dafre, A.L. (2007). Differential susceptibility following beta-amyloid peptide-(1-40) administration in C57BL/6 and Swiss albino mice: Evidence for a dissociation between cognitive deficits and the glutathione system response. *Behav. Brain Res.* **177**, 205–213.
- Salter, M.W., and Stevens, B. (2017). Microglia emerge as central players in brain disease. *Nat. Med.* **23**, 1018–1027.
- Sebastián-Serrano, Á., de Diego-García, L., and Díaz-Hernández, M. (2018). The Neurotoxic Role of Extracellular Tau Protein. *Int. J. Mol. Sci.* **19**, 998. <https://doi.org/10.3390/ijms19040998>.
- Shi, Q., Colodner, K.J., Matousek, S.B., Merry, K., Hong, S., Kenison, J.E., Frost, J.L., Le, K.X., Li, S., Dodart, J.C., et al. (2015). Complement C3-Deficient Mice Fail to Display Age-Related Hippocampal Decline. *J. Neurosci.* **35**, 13029–13042.
- Spangenberg, E., Severson, P.L., Hohsfield, L.A., Crapser, J., Zhang, J., Burton, E.A., Zhang, Y., Spevak, W., Lin, J., Phan, N.Y., et al. (2019). Sustained microglial depletion with CSF1R inhibitor impairs parenchymal plaque development in an Alzheimer's disease model. *Nat. Commun.* **10**, 3758.
- Steculorum, S.M., Paeger, L., Bremser, S., Evers, N., Hinze, Y., Idzko, M., Kloppenburg, P., and Brüning, J.C. (2015). Hypothalamic UDP Increases in Obesity and Promotes Feeding via P2Y6-Dependent Activation of AgRP Neurons. *Cell* **162**, 1404–1417.
- Tay, T.L., Béchade, C., D'Andrea, I., St-Pierre, M.K., Henry, M.S., Roumier, A., and Tremblay, M.E. (2018). Microglia Gone Rogue: Impacts on Psychiatric Disorders across the Lifespan. *Front. Mol. Neurosci.* **10**, 421.
- van der Kant, R., Goldstein, L.S.B., and Ossenkoppele, R. (2020). Amyloid- $\beta$ -independent regulators of tau pathology in Alzheimer disease. *Nat. Rev. Neurosci.* **21**, 21–35.
- Vilalta, A., and Brown, G.C. (2018). Neurophagy, the phagocytosis of live neurons and synapses by glia, contributes to brain development and disease. *FEBS J* **285**, 3566–3575. <https://doi.org/10.1111/febs.14323>.
- Wen, R.X., Shen, H., Huang, S.X., Wang, L.P., Li, Z.W., Peng, P., Mamtilahun, M., Tang, Y.H., Shen, F.X., Tian, H.L., et al. (2020). P2Y6 receptor inhibition aggravates ischemic brain injury by reducing microglial phagocytosis. *CNS Neurosci. Ther.* **26**, 416–429.
- Yang, S., Cacquevel, M., Saksida, L.M., Bussey, T.J., Schneider, B.L., Aebischer, P., Melani, R., Pizzorusso, T., Fawcett, J.W., and Spillantini, M.G. (2015). Perineuronal net digestion with chondroitinase restores memory in mice with tau pathology. *Exp. Neurol.* **265**, 48–58.
- Yang, S., Hilton, S., Alves, J.N., Saksida, L.M., Bussey, T., Matthews, R.T., Kitagawa, H., Spillantini, M.G., Kwok, J.C.F., and Fawcett, J.W. (2017). Antibody recognizing 4-sulfated chondroitin sulfate proteoglycans restores memory in tauopathy-induced neurodegeneration. *Neurobiol. Aging* **59**, 197–209.
- Zanier, E.R., Fumagalli, S., Perego, C., Pischietta, F., and De Simoni, M.G. (2015). Shape descriptors of the “never resting” microglia in three different acute brain injury models in mice. *Intensive Care Med. Exp.* **3**, 39. <https://doi.org/10.1186/s40635-015-0039-0>.

## STAR★METHODS

### KEY RESOURCES TABLE

| REAGENT or RESOURCE                                                                                                         | SOURCE                                                                                                         | IDENTIFIER                         |
|-----------------------------------------------------------------------------------------------------------------------------|----------------------------------------------------------------------------------------------------------------|------------------------------------|
| <b>Antibodies</b>                                                                                                           |                                                                                                                |                                    |
| Mouse monoclonal Anti-NeuN Antibody, clone A60                                                                              | Millipore                                                                                                      | Cat #Mab377;<br>RRID: AB_2298772   |
| Rabbit polyclonal anti-Iba1                                                                                                 | Wako                                                                                                           | Cat #019-19741;<br>RRID: AB_839504 |
| Goat anti-mouse biotinylated secondary antibody                                                                             | Vector Laboratories                                                                                            | Cat #BA-9200;<br>RRID: AB_2336171  |
| <b>Chemicals, peptides, and recombinant proteins</b>                                                                        |                                                                                                                |                                    |
| Hoechst 33342                                                                                                               | Sigma-Aldrich                                                                                                  | Cat #14533                         |
| Isolectin-B4-AlexaFluor 488 from <i>Griffonia simplicifolia</i> (IB4)                                                       | ThermoFisher                                                                                                   | Cat #I21411;<br>RRID: AB_2314662   |
| Propidium iodide                                                                                                            | Sigma-Aldrich                                                                                                  | Cat #P4170                         |
| Synthetic human amyloid $\beta$ 1-40 peptide                                                                                | Bachem                                                                                                         | Cat #H11940500                     |
| Monomeric amyloid $\beta$ 1-42 peptide                                                                                      | Anaspec                                                                                                        | Cat #AS20276                       |
| Cytochalasin D                                                                                                              | Sigma-Aldrich                                                                                                  | Cat #C8273                         |
| Uridine 5'-diphosphate disodium salt hydrate                                                                                | Sigma-Aldrich                                                                                                  | Cat #94330                         |
| Lipopolysaccharide from <i>Salmonella enterica</i> serotype typhimurium                                                     | Sigma-Aldrich                                                                                                  | Cat #L6143                         |
| 5-(and-6)-carboxytetramethylrhodamine succinimidyl ester (5(6)-TAMRA SE                                                     | Biotium Inc                                                                                                    | Cat #BT-90022                      |
| MRS2578                                                                                                                     | Sigma-Aldrich                                                                                                  | Cat #711019-86-2                   |
| Staurosporin                                                                                                                | Sigma-Aldrich                                                                                                  | Cat #62966741                      |
| Recombinant human Tau protein (isoform 2N4R)                                                                                | Dr. Vilmante Borutaite (University of Vilnius);<br>PMID: 31834946                                              | N/A                                |
| Neuronal debris                                                                                                             | This paper                                                                                                     | N/A                                |
| carboxylated 5-micron beads coupled to fluorescent Nile red dye                                                             | Spherotech                                                                                                     | Cat #FH50562                       |
| <b>Critical commercial assays</b>                                                                                           |                                                                                                                |                                    |
| ABC Elite kit mix (Vectastain ABC Kit (Standard))                                                                           | Vector Laboratories                                                                                            | Cat #PK-6100                       |
| DAB Peroxidase Substrate                                                                                                    | Vector Laboratories                                                                                            | Cat #SK-4100                       |
| ELISA cytokines and chemokines                                                                                              | Abcam                                                                                                          | Cat #ab133995                      |
| <b>Experimental models: Cell lines</b>                                                                                      |                                                                                                                |                                    |
| Human astrocytoma cell line 1321N1                                                                                          | A gift from the Department of Physiology, Development and Neuroscience, University of Cambridge; PMID: 4313504 | N/A                                |
| Human astrocytoma cell line 1321N1 expressing mCherry                                                                       | This paper                                                                                                     | N/A                                |
| Human astrocytoma cell line 1321N1 expressing murine recombinant P2Y <sub>6</sub> receptor C-terminally tagged with mCherry | This paper                                                                                                     | N/A                                |
| V-raf/v-myc immortalized murine microglial BV2 cell line                                                                    | ECACC; PMID: 1578513                                                                                           | RRID: CVCL_0182                    |
| Rat pheochromocytoma PC12 cell line                                                                                         | A gift from Dr. Tony Jackson (Department of Biochemistry, University of Cambridge);<br>PMID: 1065897           | N/A                                |

(Continued on next page)

| <b>Continued</b>                                                                                                   |                                                                                     |                        |
|--------------------------------------------------------------------------------------------------------------------|-------------------------------------------------------------------------------------|------------------------|
| REAGENT or RESOURCE                                                                                                | SOURCE                                                                              | IDENTIFIER             |
| <b>Experimental models: Organisms/strains</b>                                                                      |                                                                                     |                        |
| Mouse: C57Bl/6                                                                                                     | Charles River Laboratories                                                          | N/A                    |
| Mouse: <i>P2ry6</i> knockout ( <i>P2ry6</i> <sup>-/-</sup> ) on a C57Bl/6 background                               | Bernard Robaye (ULB Brussels); PMID: 18523137; and this paper                       | N/A                    |
| Mouse: TgP301S tau mice on a C57Bl/6 background                                                                    | Dr Michel Goedert (Laboratory of Molecular Biology); PMID: 25483398; and this paper | N/A                    |
| Mouse: <i>P2ry6</i> <sup>-/-</sup> : P301S <sup>+/+</sup> mice on a C57Bl/6 background                             | This paper                                                                          | N/A                    |
| Rat: Wistar                                                                                                        | Charles River Laboratories                                                          | RRID: RGD_2312511      |
| <b>Oligonucleotides</b>                                                                                            |                                                                                     |                        |
| <b>Primer sequences: <i>P2ry6</i> WT and <i>P2ry6</i> knockout</b> Y601s - reverse primer: 5'-TGGAATTCAGACTGAGGACG | Sigma (Primer sequence details in this paper)                                       | Y601s                  |
| <b>Primer sequence: <i>P2ry6</i> WT</b> Y601as - forward primer: 5'-GGTAGCGCTGGAAGCTAATG                           | Sigma (Primer sequence details in this paper)                                       | Y601as                 |
| <b>Primer sequence: <i>P2ry6</i> knockout</b> Cpl4s -forward primer: 5'-AGGTGTTGTGACAGAAGTGTG                      | Sigma (Primer sequence details in this paper)                                       | Cpl4s                  |
| <b>Primer sequence: P301S WT and mutant P301S</b> Cdown - reverse primer: 5'-GCAGCCTAGCTCAGTATAATG                 | Sigma (Primer sequence details in this paper)                                       | Cdown - reverse primer |
| <b>Primer sequence: P301S WT</b> Nup - forward primer: 5'-CTCCAGATTTGTGTAGAATGGC                                   | Sigma (Primer sequence details in this paper)                                       | Nup - forward primer   |
| <b>Primer sequences: mutant P301S band:</b> CT3- forward primer: 5'-CACCCACTCGTTCACTGTCC.                          | Sigma (Primer sequence details in this paper)                                       | CT3- forward primer    |
| <b>Software and algorithms</b>                                                                                     |                                                                                     |                        |
| ImageJ                                                                                                             | <a href="https://imagej.nih.gov/ij/">https://imagej.nih.gov/ij/</a>                 | RRID:SCR_003070        |
| SMART junior Panlab                                                                                                | Home ( <a href="http://panlab.com">panlab.com</a> )                                 | RRID:SCR_012154        |
| GraphPad Prism Version 6                                                                                           | <a href="https://www.graphpad.com/">https://www.graphpad.com/</a>                   | RRID:SCR_015807        |
| Halo image analysis platform- indica labs algorithm, with few modifications                                        | <a href="https://indicalab.com/halo/">https://indicalab.com/halo/</a> ; This paper  | N/A                    |

## RESOURCE AVAILABILITY

### Lead contact

Further information and requests for resources and reagents should be directed to and will be fulfilled by the lead contact, Guy Charles Brown ([gcb3@ca.ac.uk](mailto:gcb3@ca.ac.uk)).

### Materials availability

The new transgenic mice (lacking *P2ry6* and expressing human mutant P301S Tau) generated in this study are no longer available due to animal welfare and licenses. However, the parental strains are listed in the Key Resources Table and the crossing of the mice is described in this paper. The P2Y6R-mCherry plasmids generated in this project are no longer available, but the stable astrocytoma cell lines these plasmids were used to generate, expressing P2Y6R-mCherry and mCherry control, are currently available from the lead contact with a completed Materials Transfer Agreement.

### Data and code availability

Microscopy, behavioral, and flow cytometry data reported in this paper will be shared by the lead contact upon request.

This paper does not report original code.

Any additional information required to reanalyze the data reported in this paper is available from the lead contact upon request.

## EXPERIMENTAL MODEL AND SUBJECT DETAILS

### Mice

All animal work was carried out in accordance with the Animals (Scientific Procedures) Act 1986 Amendment Regulations 2012 following ethical review by the University of Cambridge Animal Welfare and Ethical Review Body (AWERB). *P2ry6* knockout (*P2ry6*<sup>-/-</sup>) mice were kindly provided by Bernard Robaye (ULB Brussels) and maintained on a C57BL/6 background (Charles River Laboratories). *P2ry6*<sup>-/-</sup> mice and wild-type (WT) littermates were used to establish homozygous WT and *P2ry6*<sup>-/-</sup> sub-lines. In offspring from these sub-lines, littermates were randomly assigned to control and Aβ treatment groups. Details of experimental animals used for Aβ injection studies are given below:

| Study                                                                                | Treatment group | Genotype                    | Number of animals | Sex    | Age range (weeks) | Weight range at start of procedure (g, grams) |
|--------------------------------------------------------------------------------------|-----------------|-----------------------------|-------------------|--------|-------------------|-----------------------------------------------|
| intracerebroventricular injection (i.c.v.)<br>injection of Aβ1-40 (14-day follow-up) | Control         | WT                          | 6                 | female | 42 – 46           | 30-39                                         |
|                                                                                      | Treatment       | WT                          | 6                 | female | 42 – 46           | 29-40                                         |
|                                                                                      | Control         | <i>P2ry6</i> <sup>-/-</sup> | 4                 | female | 41 – 43           | 28-40                                         |
|                                                                                      | Treatment       | <i>P2ry6</i> <sup>-/-</sup> | 4                 | female | 41 – 43           | 30-38                                         |
| i.c.v. injection of Aβ1-40 (3-day follow-up)                                         | Control         | WT                          | 3                 | female | 43 – 49           | 31-42                                         |
|                                                                                      | Treatment       | WT                          | 4                 | female | 43 – 49           | 30-38                                         |
|                                                                                      | Control         | <i>P2ry6</i> <sup>-/-</sup> | 3                 | female | 40 – 45           | 29-36                                         |
|                                                                                      | Treatment       | <i>P2ry6</i> <sup>-/-</sup> | 3                 | female | 40 – 45           | 30-38                                         |

Transgenic homozygous TgP301S tau mice (*P301S*<sup>+/+</sup>) expressing human mutant P301S tau under the control of the murine Thy1.2 promoter (Allen et al., 2002) were maintained on a C57BL/6 background (Charles River Laboratories). Both female and male mice were used in the present study. Animals were housed in groups of 3 to 5 with access to food and water *ad libitum* in a colony room kept at 19–22°C and 40%–60% humidity, under a 12-h light/dark cycle in i.v.c cages on wood-chip bedding with paper strip nesting material. Regular monitoring of health status revealed no significant presence of pathogens.

### Generation of double transgenic *P2ry6*<sup>-/-</sup>; *P301S*<sup>+/+</sup> mice

Homozygous *P301S*<sup>+/+</sup> mice were crossed with homozygous *P2ry6*<sup>-/-</sup> mice to obtain double heterozygous *P301S*<sup>+/-</sup>; *P2ry6*<sup>+/-</sup> mice. These mice were crossed again with double heterozygous *P301S*<sup>+/-</sup>; *P2ry6*<sup>+/-</sup> mice to obtain the final genotypes: wild-type (WT), *P2ry6* knockout (*P2ry6*<sup>-/-</sup>), homozygous TgP301S tau (*P301S*<sup>+/+</sup>) and double transgenic (*P2ry6*<sup>-/-</sup>; *P301S*<sup>+/+</sup>) mice. All mice were on a C57BL/6 background (Charles River Laboratories). For more information see Figure S8. Genotypes were determined by PCR analysis. Primers for allele genotyping had the following nucleotide sequence: **A) *P2ry6* PCR: For WT band:** (1) Y601s - reverse primer: 5¢- TGGAAATTCAGACTGAGGACG, (2) Y601as - forward primer: 5¢- GGTAGCGCTGGAAGCTAATG; **For *P2ry6* knockout band:** (1) Y601s - reverse primer: 5¢- TGGAAATTCAGACTGAGGACG, (3) Cpl4s - forward primer: 5¢- AGGTGTTGTGACAG AAGTGTG; **B) *P301S* PCR: For WT band:** (4) Cdown - reverse primer: 5¢- GCAGCCTAGCTCAGTATAATG, (5) Nup - forward primer: 5¢- CTCCAGATTGTGTAGAATGGC; **For mutant *P301S* band:** (4) Cdown - reverse primer: 5¢- GCAGCCTAGCTCAGTATAATG, (6) CT3- forward primer: 5¢- CACCCACTCGTTCCTACTGTCC.

### Primary cell cultures

Primary mixed neuronal/glia cultures were prepared from cerebella of postnatal day 3-5 WT and *P2ry6* knockout (*P2ry6*<sup>-/-</sup>) mouse pups as previously described (Carrillo-Jimenez et al., 2018). After 7-9 days the culture composition of these cultures was 85 ± 5% neurons, 7 ± 3% astrocytes, and 5 ± 3% microglia. Primary mouse microglial cells were prepared as previously described (Carrillo-Jimenez et al., 2018). Briefly, mixed glial cultures were obtained from the cortex of mouse pups (postnatal day 4-7). Isolated primary microglial cultures were obtained by gently vortexing the mixed glial culture for 1 min to detach microglia and centrifuging the supernatant at 150 g for 7 min with no brake. The microglia were resuspended in medium consisting of one-part conditioned media and two parts fresh DMEM supplemented with 10% FBS. The cells were seeded on poly-L-lysine coated 24-well plate at 1 × 10<sup>5</sup> cells/well density and incubated overnight before the phagocytosis assay. All tissue culture medium was supplemented with 100 U/mL penicillin and 100 µg/mL streptomycin (Invitrogen). All cells were kept in a humidified incubator at 37°C and 5% CO<sub>2</sub>.

### BV2 and PC12 cell cultures

The v-raf/v-myc immortalized murine microglial BV2 cell line was maintained in DMEM supplemented with 10% FBS (Invitrogen) in T-75 flasks (Nunc). At confluence, the cells were harvested using 0.05% trypsin/ ethylenediaminetetraacetic acid (EDTA) (Invitrogen) and were seeded in 24-well plates (5 × 10<sup>4</sup> cells/well, Nunc) in DMEM supplemented with 0.5% FBS. Rat pheochromocytoma PC12

cell line was maintained in RPMI-1640 medium supplemented with 10% horse serum (Invitrogen) and 5% FBS in T-75 flask coated with 0.5 mg/mL collagen type IV (Sigma). At confluence, the cells were harvested using 0.05% trypsin/EDTA and were seeded in 10 cm<sup>2</sup> dish (3 × 10<sup>6</sup> cells/dish, Falcon), 6-well plate (1 × 10<sup>6</sup> cells/well, Nunc), or 24-well plate (2.5 × 10<sup>5</sup> cells/well, Nunc).

### Human astrocytoma cell line 1321N1

Human astrocytoma cell line 1321N1 was stably transfected with mCherry alone or murine recombinant P2Y<sub>6</sub> receptor C-terminally tagged with mCherry. Both cell lines were maintained as with BV2 (plus G418 selection) and seeded in a 96-well plate at 2 × 10<sup>4</sup> cells/well.

## METHOD DETAILS

### Primary cell culture experiments

Primary mixed neuronal/glial cultures were treated with either 100 μM UDP, 250 nM of monomeric amyloid β1-42 for three days or 3 μM TAU protein (2N4R isoform, expressed in *E. coli*, provided by V. Smirnovas, and prepared as previously described (Pampuscenko et al., 2020)) for two days. When indicated, cultures were pre-incubated with 1 μM MRS2578 (Sigma-Aldrich) for 30 min. To determine the cell viability after UDP and TAU treatment, mixed neuronal/glial cultures were stained with the nuclear dye Hoechst 33342 (5 μg/mL) to identify healthy and apoptotic nuclei, 488-tagged isolectin-B4 (1 μg/mL) to identify microglia and propidium iodide (PI, 2 μg/mL) to identify necrotic cells, and cells were imaged and analyzed as previously described (Carrillo-Jimenez et al., 2018). To assess cell viability after Aβ treatment, we measured the rate of reduction of 3-(4,5-dimethylthiazol-2-yl)-2,5-diphenyltetrazolium (MTT) to formazan by the cells. Thus, mixed neuronal/glial cultures were incubated with MTT (0.58 mg/mL) for 2 h at 37°C. Afterward, the converted dye was liberated from the cells and solubilized by the addition of dimethyl sulfoxide (DMSO), and the absorbance intensity of λ = 590 nm light was measured.

### Microglial phagocytosis of beads and neuronal debris

5-micron beads (carboxylated and coupled to fluorescent Nile red dye, Spherotech) were added at 0.005% (w/v) to primary mouse microglia for 1 h. Media was aspirated and cells washed several times with cold phosphate-buffered saline (PBS), then lifted by trypsinization and resuspended in PBS, and uptake of beads into cells was assessed by flow cytometry (Accuri C6 BD). The percentage of microglia that had taken up beads was quantified using a microglial gate that excluded free beads, and a gate of microglia that had taken up one or more beads. At least 5,000 cells were analyzed for each treatment in replicate.

Neuronal debris was prepared by replacing the culture medium of a live neuronal-glial culture with PBS, scratching and scraping the cells with a cell scraper, and passing cells 10 times through a 0.4 mm × 13 mm syringe needle. Debris was labeled with 50 μM 5-(and-6)-carboxytetramethylrhodamine succinimidyl ester (5(6)-TAMRA SE, from Biotium Inc BT90022) for 15 min at 37°C, then washing twice with PBS using a 5 kDa spin column (10,000 g for 5 min). 30 μg of neuronal debris (corresponding to about 1 × 10<sup>5</sup> dead neurons) were added to each well of 1 × 10<sup>5</sup> microglia in a 24-well plate for 1 h at 37°C. Medium was aspirated and cells washed twice with cold PBS, then lifted by trypsinization and resuspended in PBS, and uptake of debris into microglia was assessed by flow cytometry (Accuri C6 BD). The percentage of microglia that had taken up debris was quantified using a microglial gate that excluded debris, and a gate of microglia that had taken up debris. At least 5,000 cells were analyzed for each treatment in replicate.

### Cytokine and chemokine release from microglia

Primary microglia were isolated from mixed glial cultures from wild-type and P2ry6<sup>-/-</sup> mice and treated with ± 100 ng/mL lipopolysaccharide for 16 h, then the extracellular cell supernatant was centrifuged at 10,000 RCF to remove cellular debris. The supernatant was then assayed using an ELISA for 62 mouse cytokines and chemokines as per the manufacturer's instructions (Abcam, ab133995). Densitometric measurements were quantified using ImageJ, and intensity values normalized between membranes using positive control spots.

### BV2 and PC12 experiments

BV2 cell phagocytosis of PC12 cells was performed and analyzed as previously described (Fricker et al., 2012). BV2 cells were allowed to adhere for 24 h then LPS activated (100 ng/mL) for a further 24 h. The cells were pre-treated ± MRS2578 (1 μM, 60 min) or cytochalasin D (0.5 μM, 30 min) prior to the co-culture as indicated. PC12 cells in suspension were treated with staurosporine or monomeric amyloid-β 1-42 for 24 h. PC12 cells were harvested, stained with TAMRA for 15 min in PBS, and washed in five times excess volumes of PBS. The untreated and treated PC12 cells were seeded on BV2 cells at 3 × 10<sup>5</sup> cells/well and the co-culture was incubated for 3 h. BV2 cells were stained with IB4-Alexa488 for 15 min prior to the end of the co-culture period. After 3 h, the cultures were washed 3 times with ice-cold PBS to remove un-phagocytosed PC12 cells, and the remaining cells were harvested by trypsinization, centrifuged at 150 × g for 5 min at 4°C, and resuspended in PBS on ice. FL1 (IB4-Alexa488) and FL3 (TAMRA) fluorescence of harvested cells were measured by BD Accuri C6 flow cytometer. FSC and FL1 fluorescence were used to positively select the BV2 cell population and eliminate PC12 cells. 10,000 BV2 cell events per well, from triplicate per condition, were collected, and the proportion of stained BV2 cells that had shifted into a TAMRA (FL3) gate was measured.



For primary microglial phagocytosis of stressed PC12 cells, PC12 cells were pre-treated for 24 h with 500 nM monomeric amyloid beta 1-42 (Anaspec) or vehicle. PC12 cells were TAMRA stained as previously described, then washed, and any clumps were dissociated by treatment with 50  $\mu$ M EDTA. Primary rat microglia were seeded at 30,000 cells per well and pre-treated with 1  $\mu$ M MRS2578 or DMSO vehicle for 1 h prior to the addition of 100,000 TAMRA-stained PC12 cells per well. After 90 min of phagocytosis, cells were detached by trypsinization and microglia stained with Alexa488-conjugated IB4, and phagocytosis quantified by flow cytometry as above.

### Bioassay of UDP concentrations using P2Y<sub>6</sub> receptors transfected astrocytoma cells

UDP concentrations outside PC12 cells were estimated by adding the medium to astrocytoma cells transfected with the P2Y<sub>6</sub> receptor and measuring the induced calcium response relative to known amounts of UDP. As previously indicated, human astrocytoma cell line 1321N1 was stably transfected with mCherry alone or murine recombinant P2Y<sub>6</sub> receptor C-terminally tagged with mCherry. Both cell lines were maintained as with BV2 (plus G418 selection) and seeded in a 96-well plate at  $2 \times 10^4$  cells/well, washed with Flex buffer, and loaded with 0.5  $\mu$ M Fura-2 AM for 1 h (plus 0.5 mg/mL Pluronic F-127), washed and replaced with 100  $\mu$ L Flex buffer, and transferred into the FlexStation 3 Microplate Reader (Molecular Devices) maintained at 37°C. PC12 cells were treated, washed, and resuspended in 1 mL Flex buffer for 1 h incubation at 37°C, then centrifuged and the conditioned Flex buffer supernatant used to stimulate 1321N1 cells expressing P2Y<sub>6</sub>R-mCherry or mCherry.

### Intracerebroventricular injection of A $\beta$ 1-40

Synthetic human amyloid  $\beta$  1-40 peptide (Bachem) was dissolved in DMSO (Sigma) to 5 mM, diluted in 1x PBS (LifeTech) to 100  $\mu$ M, and left to aggregate for 24 h at 4°C with gentle agitation. 400 pmoles (4  $\mu$ l) of aggregated A $\beta$ 1-40 or 4  $\mu$ l PBS (control) were injected into the right ventricle of adult (9-12-month-old) wildtype or *P2ry6*<sup>-/-</sup> mice using a 26-gauge needle on a stereotaxic frame. Injections were carried out under isoflurane anesthesia with appropriate analgesia and post-op care using a stereotaxic frame (Kopf Instruments). Injection coordinates were antero-posterior (AP) -0.6 mm, medio-lateral (ML) 1.2 mm, dorso-ventral (DV) -2.2 mm from Bregma, flat skull. Mice were allowed to recover, and tissues were collected 3 or 14 days after injection.

### Novel object recognition test (NORT) and spontaneous locomotor activity

Novel object recognition testing was performed in a 30  $\times$  44 cm arena with opaque sides. To evaluate memory loss in the acute A $\beta$  model, 2 or 12 days after PBS or A $\beta$ 1-40 i.c.v. injection, animals were habituated in the arena without any objects present for two 10-min sessions two h apart. The next day, two identical objects were presented for a 10-min familiarization session followed by a 2-min retention interval and a 5-min test session with one familiar and one novel object. The order of testing of mice from different experimental groups was randomized on day 1 and maintained in the same order on day 2. Object interaction times and ratios were extracted from digital recordings of the trials using modified "Autotyping" software.

For the P301S mice, NORT was performed similarly to above, but with a 24 h retention time to test long-term memory (Giralt et al., 2012). Briefly, mice were first habituated to the arena in the absence of objects on two consecutive days (15 min/day), when spontaneous locomotor activity (total distance traveled) and anxiety/motivation (distance traveled in periphery v. center of the open field) was measured. On the third day, two similar objects were presented for 10 min (A and A' objects). Twenty-four h later, the same animals were retested for 5 min in the arena with a familiar (A) and a new (B) object. The object preference was measured as the time exploring each object  $\times$  100/time exploring both objects. Animals were tracked and recorded with SMART Junior software (Panlab). Objects and arena were cleaned thoroughly with 70% ethanol and dried after each trial to eliminate odor cues.

### Motor coordination

Motor coordination, muscle function, and markers of disease progression were evaluated as described in (Guyenet et al., 2010). Measures included hind limb clasping, ledge test, gait, and kyphosis. A composite phenotypic score was also calculated as in (Guyenet et al., 2010).

### Transcardial perfusion and tissue sectioning

Mice were given terminal anesthesia (150  $\mu$ l Euthatal intraperitoneal (i.p.)) and, once unresponsive to pain, perfused transcardially, through a 25-gauge needle, with 20 mL PBS pH 7.4 followed by 60 ml 4% paraformaldehyde (PFA), pH 7.4 using a perfusion pump with a flow rate of 4 mL/min. Following perfusion, brains were removed and post-fixed overnight in the same solution, cryoprotected by immersion in an increased 10%–30% sucrose solution until sectioning. Brain sections were cut to 20  $\mu$ m thickness using a Compressstome VF-200 vibratome (Precisionary Instruments), collected on Superfrost Plus slides (Thermo Fisher), and dried overnight. Serial coronal sections (25  $\mu$ m) through the whole brain were collected using a sliding microtome and placed in PBS as free-floating sections.

### Nissl staining

Matched brain slices were identified based on anatomical landmarks and placed directly into a 1:1 ethanol:chloroform mixture and incubated overnight at room temperature. Following rehydration series from 100% ethanol to water, staining was carried out in 0.1% cresyl violet solution at 37°C for 10 min. Slices were then quickly rinsed in water, de-stained in 95% ethanol for 2-5 min, dehydrated in

100% ethanol for 10 min, cleared in xylene for 10 min and coverslips mounted. Stained slides were imaged on a Leica DMI6000 CS microscope with a 10x, 0.3NA air objective and tile scanning option to assemble the entire brain section.

### Immunostaining of non-free-floating brain slices

All steps were carried out at room temperature unless indicated otherwise. Brain slices were re-hydrated for 1 h in PBS and heat-mediated antigen retrieval was carried out at 95°C for 20 min in citrate buffer (10 mM sodium citrate, 0.05% Tween 20, pH 6.0). Following washes in PBS (6 × 10 min), slices were permeabilized in PBS with 0.5% Triton X-100 for 10 min followed by 1 h incubation in blocking solution (50% normal goat serum in PBS). Slices were then incubated in primary antibody solution (5% normal goat serum in PBS plus appropriate primary antibody) at 4°C overnight. Following washes in PBS (6 × 10 min), slices were incubated with secondary antibody for 2 h, washed (6 × 10 min, PBS), and mounted using Vectashield mounting medium with DAPI (Vector Laboratories). Primary antibodies used were Anti-NeuN (Millipore, mouse monoclonal, 1:500 dilution) and anti-Iba1 (Wako, rabbit polyclonal, 1:500 dilution). Secondary antibodies were Alexa Fluor 488 anti-mouse, Alexa Fluor 568 anti-rabbit, and Alexa Fluor 633 anti-rabbit (all ThermoFisher, goat, 1:1000 dilution). Imaging was carried out on an Olympus FV1000 upright laser-scanning confocal microscope with a 60x, 1.35NA oil immersion objective using 488, 559, and 635 nm laser lines.

### Image analysis using ImageJ 1.49 software

All image analysis was carried out using ImageJ 1.49 software and all manual counting and quantification was performed blinded to genotype and treatment condition. Following background removal, the average Nissl intensity of the entire hippocampal cornu ammonis 1 (CA1) and cornu ammonis 3 (CA3) areas was quantified and their width was determined at three fixed points along their length. Four brain sections were analyzed per animal, with both right and left sides of the hippocampus included in the analysis. For quantification of neuronal density in the prefrontal cortex, regions of interest of fixed size were placed randomly in anatomically matched sections and NeuN<sup>+</sup> cells were counted manually. Three areas were counted on each side of the midline for a total of four sections per animal.

Microglia phagocytosis of neuronal material was quantified in sections stained for NeuN and Iba1. Three images were taken for each area of interest (CA1, CA3, prefrontal cortex) per mouse, and z stacks of all microglia (as identified by positive Iba1 staining) were analyzed for NeuN<sup>+</sup> inclusions inside the microglia in X, Y, and Z dimensions. In order to be considered positive, inclusions had to appear in at least two subsequent z slices. In the same images, microglial shape descriptors were analyzed as described in (Zanier et al., 2015). Following automated background removal, maximum-intensity z-projection, and automated binarization, a size filter was applied for objects and microglial shape descriptors were obtained (ImageJ – solidity, perimeter).

### Immunostaining of free-floating brain slices

Five to six free-floating sections taken every 12th brain sections of 8-9 WT, *P2ry6*<sup>-/-</sup>, *P301S*<sup>+/+</sup> and *P2ry6*<sup>-/-</sup>:*P301S*<sup>+/+</sup> mice were used for immunohistochemistry. Sections were rinsed three times in PBS and incubated with 20% methanol, 3% hydrogen peroxide in PBS for 30 min at room temperature for quenching endogenous peroxidase activity. Sections were rinsed 3 times in 0.3% Triton-X in PBS (PBS-T) and were subsequently incubated overnight with shaking at 4°C with either NeuN or AT8 primary antibodies (NeuN; 1:500, Millipore, mab377; AT8; 1:700, Thermo Scientific, MN1020). Primary antibody incubation was extended for 2 more h at RT with shaking. Following 3 washes in PBS-T, sections were then incubated for 1 h at RT with the goat anti-mouse biotinylated secondary antibody (Vector Laboratories, BA-9200) diluted 1:250 in PBS-T. Subsequently, sections were washed 3 times in PBS-T and incubated with ABC Elite kit mix (Vectastain ABC Kit (Standard), PK-6100) for 30 min, following manufacturer's instructions, and washed 3 times with PBS-T. The immunostaining was visualized with diaminobenzidine (DAB Vectastain kit (Vector)). (DAB Peroxidase Substrate Cat. No. SK-4100; Vector Laboratories) until desired stain intensity developed, approximately 2 min at RT. The sections were then quickly washed with 0.1% sodium azide - PBST and rinsed 3 times with PBST. Sections were then mounted on glass slides and dried in 37°C oven. Following dehydration of tissue sections in ascending concentration of alcohols, they were cleared in xylene and coverslipped with DPX (a mixture of distyrene, a plasticizer, and xylene). The tissue sections were finally scanned using a Zeiss Axioscan Z1 slide scanning microscope.

### Image analysis of free-floating brain slices' immunostaining

For image analysis and quantification of NeuN density, the Halo image analysis platform was used. First, the whole brain coronal slice was first highlighted and the perirhinal cortex (PRh) or motor cortex contour was outlined. NeuN-positive neurons in the corresponding outlined area were identified using the Indica labs algorithm, with few modifications (Image zoom: 0.4; Minimum tissue OD: 0.007; Nuclear contrast threshold: 0.53; Minimum nuclear OD: 0.695; Nuclear size: 26,717.717; Minimum nuclear roundness: 0.298; Nuclear segmentation aggressiveness: 1). Data are presented as neuronal density per mm<sup>2</sup>.

## QUANTIFICATION AND STATISTICAL ANALYSIS

### Statistical analysis

In the *in vivo* studies, each data point represents either one field of view (Figures 1A–1D), one Iba1+ cell (Figures 1F–1G), or one animal (all other figures). In the *in vitro* studies, bars represent mean and SEM of N = 3-5 independent experiments performed in triplicate.

Statistical significance for experiments with more than two groups was analyzed by two-way ANOVA with Tukey-corrected post hoc comparisons, except in [Figures S5D–S5I](#) where we compared periphery versus center for each group and therefore used one-way ANOVA with Bonferroni post hoc comparisons. Statistical differences in [Figure 4G](#) and [4H](#) comparing two groups were calculated by using a two-tailed Student's t test. Statistical differences in [Figure S3](#) comparing two groups (LPS-treated WT versus LPS-treated P2Y6<sup>-/-</sup> microglia) were calculated by multiple unpaired t test followed by Holm-Sidak multiple comparisons test. All experiments were analyzed using GraphPad Prism 6 (GraphPad software). Graphical data were shown as individual data points, including mean values with error bars indicating SEM. P values of \*  $p < 0.05$ , \*\*  $p < 0.01$ , \*\*\*  $p < 0.001$ , \*\*\*\*  $p < 0.0001$  indicated significant differences between groups. For each graph, all genotypes were compared, and if there is no marker of significance on the graph, then any difference was not significant. For each experiment and graph, statistical details including the statistical test used, the exact value of n, what n represents (field of view, number of cells, number of animals per genotype, etc.) as well as dispersion and precision measures (mean, SEM, etc.), can be found in each figure legend.

**Cell Reports, Volume 37**

**Supplemental information**

**The microglial P2Y<sub>6</sub> receptor  
mediates neuronal loss and memory deficits  
in neurodegeneration**

**Mar Puigdellívol, Stefan Milde, Anna Vilalta, Tom O.J. Cockram, David H. Allendorf, Jeffrey Y. Lee, Jacob M. Dundee, Katryna Pampuščenko, Vilmante Borutaite, Hugh N. Nuthall, Jack H. Brelstaff, Maria Grazia Spillantini, and Guy C. Brown**

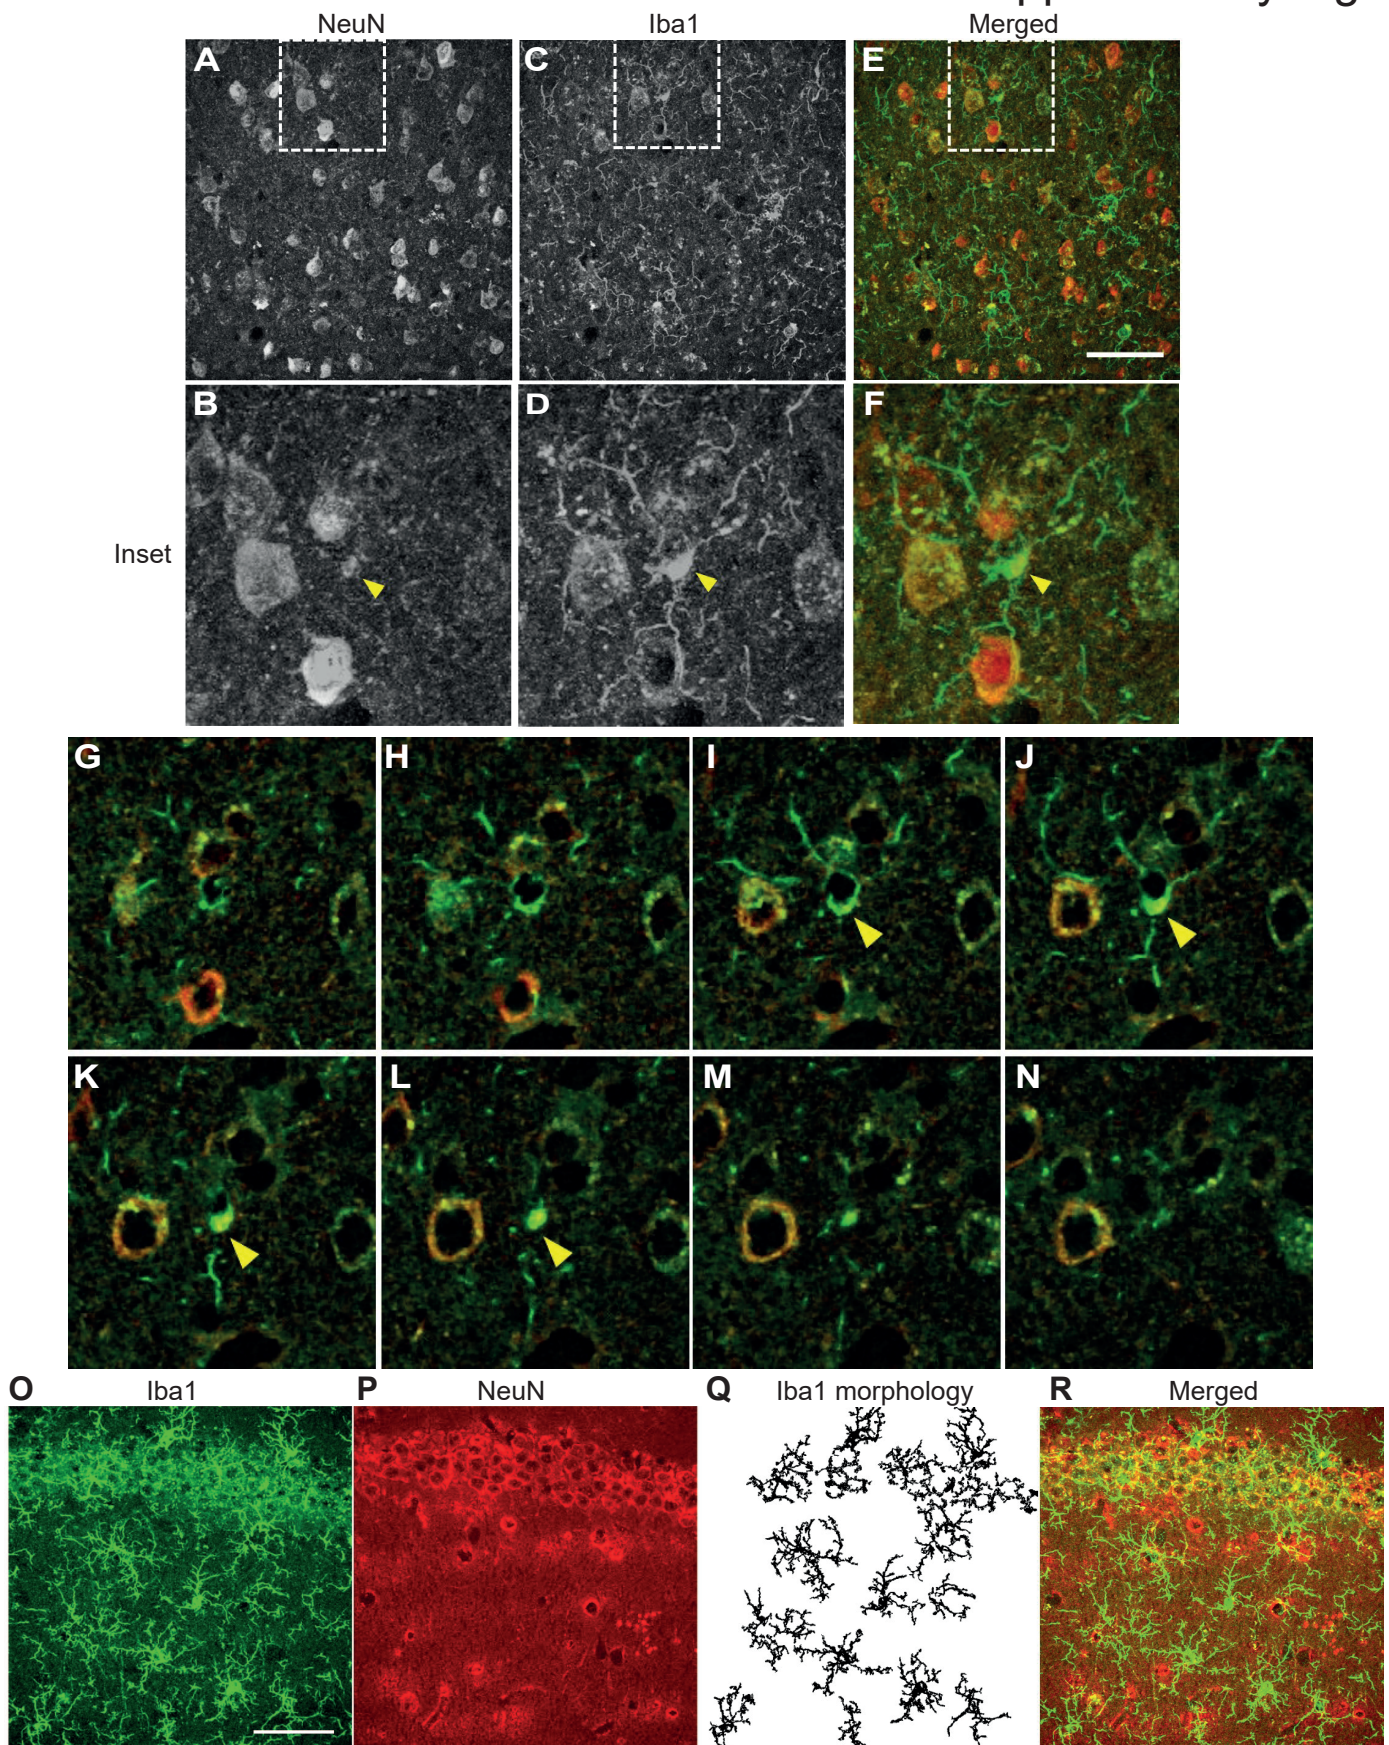

**Figure S1. NeuN internalization within microglia in the prefrontal cortex and the hippocampus of  $A\beta$ -injected wild-type mice.** Representative image of Iba1-positive microglia within NeuN-positive material ingested in coronal sections of prefrontal cortex following i.c.v injection of  $A\beta$  in wild-type (WT) mice. **A, C, E**, Larger field of prefrontal cortex region imaged for NeuN (**A**, gray scale), Iba1 (**C**, gray scale) and images merged (**E**, NeuN (neurons, red) and Iba1 (microglia, green)). Scale bar: 50  $\mu$ m. **B, D** and **F**, Insets of **A**, **C** and **E**, respectively, providing a larger image of a single Iba1-positive (green) microglial cell with NeuN-positive material (red) inside (overlap yellow). **G-N**, Consecutive Z stacks of (**F**) showing that NeuN puncta colocalising Iba1 appeared in contiguous z-slices (yellow arrows, I-L). Yellow arrows indicate NeuN internalisation within microglia. **O, P, R**, Larger field of hippocampal region CA1 imaged for Iba1 (**O**, microglia, green), for NeuN (**P**, neurons, red), and these images merged (**R**). Scale bar: 50 $\mu$ m. **Q**, Raw confocal image (**O**) was segmented into microglial cells colocalizing with NeuN and background, showing a range of microglia and their morphologies. Related to Figure 1.

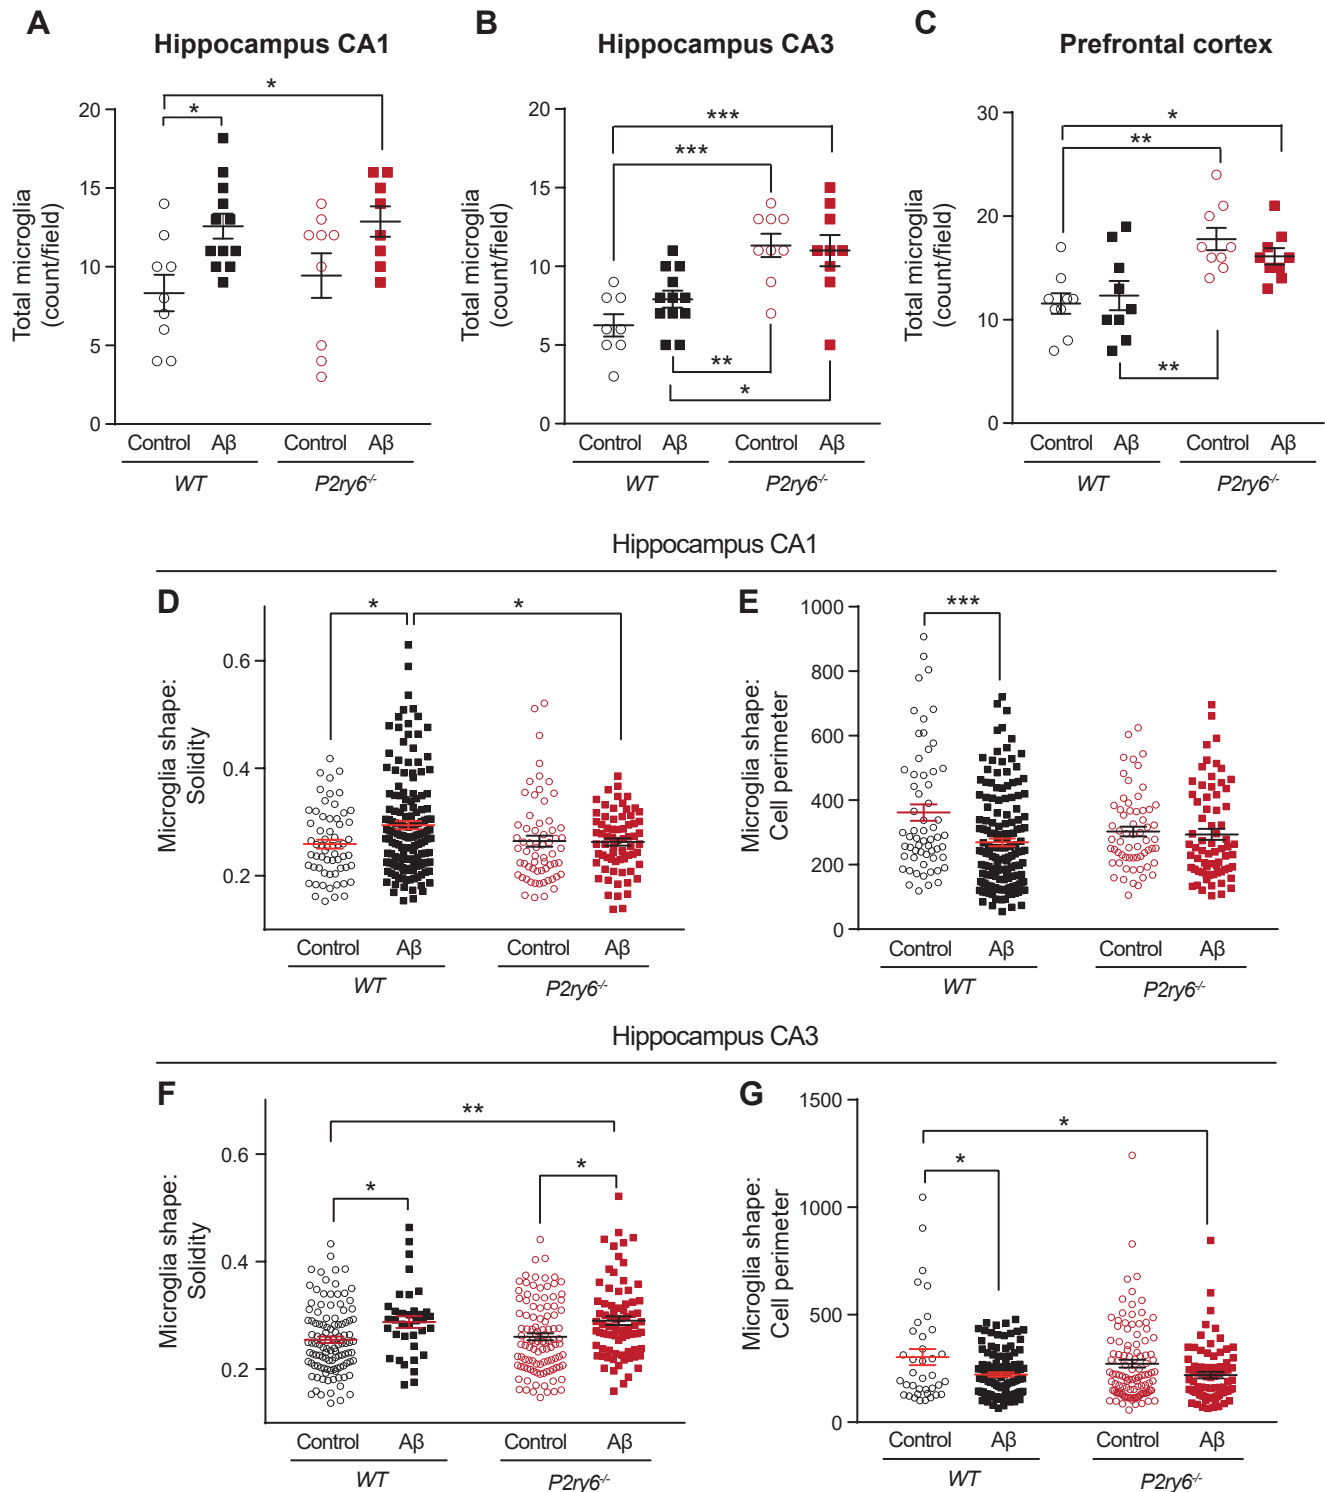

**Figure S2. A $\beta$  injection causes a mild morphological activation of microglia, which is little affected by P2ry6 knockout in mice.** **A-C**, Analysis of microglial density in anatomically matched sections of hippocampal and cortical sections stained with anti-Iba1 antibody following i.c.v. injection of A $\beta$ 1-40 (A $\beta$ ) or PBS (control) in 10-month-old WT and P2ry6<sup>-/-</sup> mice. Total number of microglia per field of view in CA1 (**A**), CA3 (**B**) and prefrontal cortex (**C**). Each data point represents one field of view. Number of mice: WT-A $\beta$  = 6, WT+A $\beta$  = 6, KO-A $\beta$  = 4, KO+A $\beta$  = 4. Error bars indicate mean  $\pm$  SEM. Statistical analysis was performed using two-way ANOVA with post hoc Tukey's multiple comparison test. \* $p$ <0.05, \*\*  $p$ <0.01, \*\*\*  $p$ <0.001. **D-G**, Analysis of microglial activation state by automated shape analysis in anatomically matched sections of hippocampus and prefrontal cortex following i.c.v. injection of A $\beta$ 1-40 (A $\beta$ ) or PBS (control) in 10-month-old WT and P2ry6<sup>-/-</sup> mice. Automated quantification of microglia shape solidity and perimeter in CA1 (**D** and **E**, respectively), and CA3 (**F** and **G**, respectively). Each data point represents one Iba1 + cell. Number of mice: WT-A $\beta$  = 6, WT+A $\beta$  = 6, KO-A $\beta$  = 4, KO+A $\beta$  = 4. Error bars indicate mean  $\pm$  SEM. Statistical analysis was performed using two-way ANOVA with post hoc Tukey's multiple comparison test. \* $p$ <0.05, \*\* $p$ <0.01, \*\*\* $p$ <0.001. For each graph, all genotypes  $\pm$  A $\beta$  were compared, and if there is no marker of significance on the graph, then any difference was not significant. Related to Figure 1.

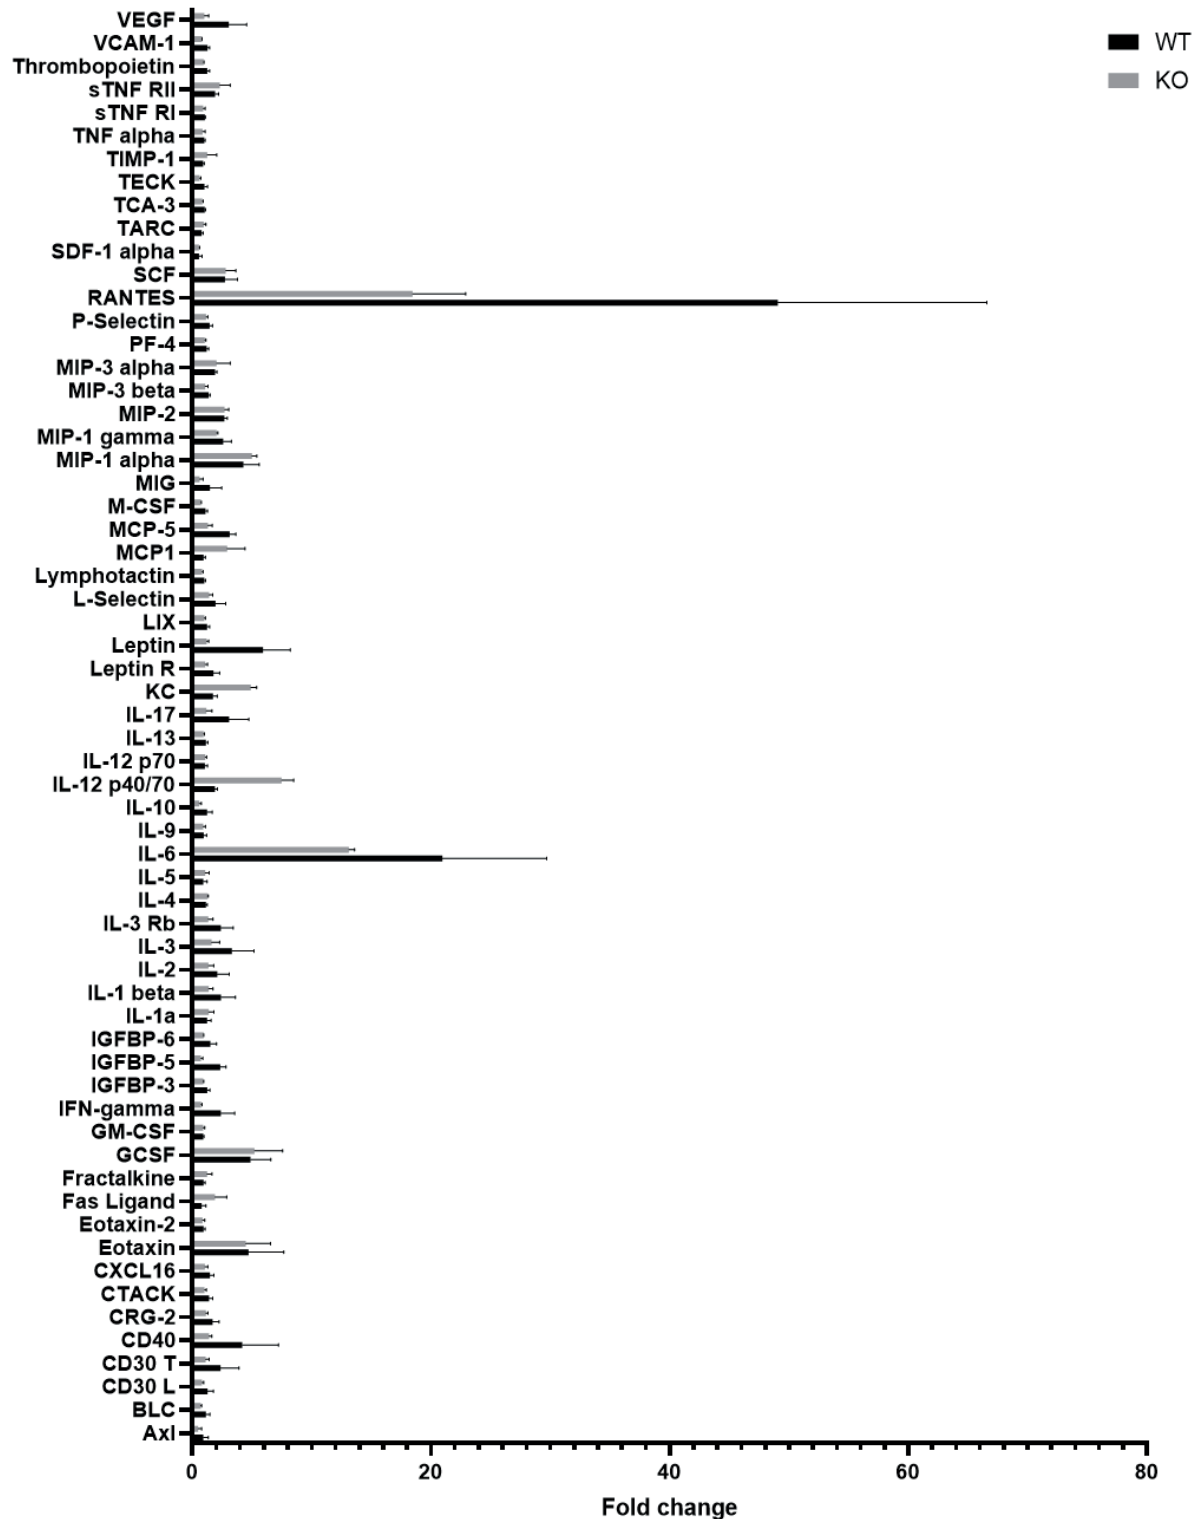

**Figure S3. Similar microglia inflammatory profile of wild-type and P2ry6 knockout mice.** ELISA array of 62 inflammatory cytokines and chemokines in the extracellular cell supernatant of primary microglia isolated from mixed glial cultures from wild-type and P2ry6<sup>-/-</sup> mice treated with  $\pm$  100 ng/ml lipopolysaccharide for 16 hours. Three independent experiments/genotype. The mean  $\pm$  SEM of the LPS-induced fold change in each cytokine or chemokine is plotted, and the significance of these changes between wild-type and P2ry6<sup>-/-</sup> microglia were compared using multiple unpaired t-tests followed by Holm-Šidak multiple comparisons test. None of these differences in LPS-induced fold change between wild-type and P2ry6<sup>-/-</sup> microglia were statistically significant. Related to Figure 1.

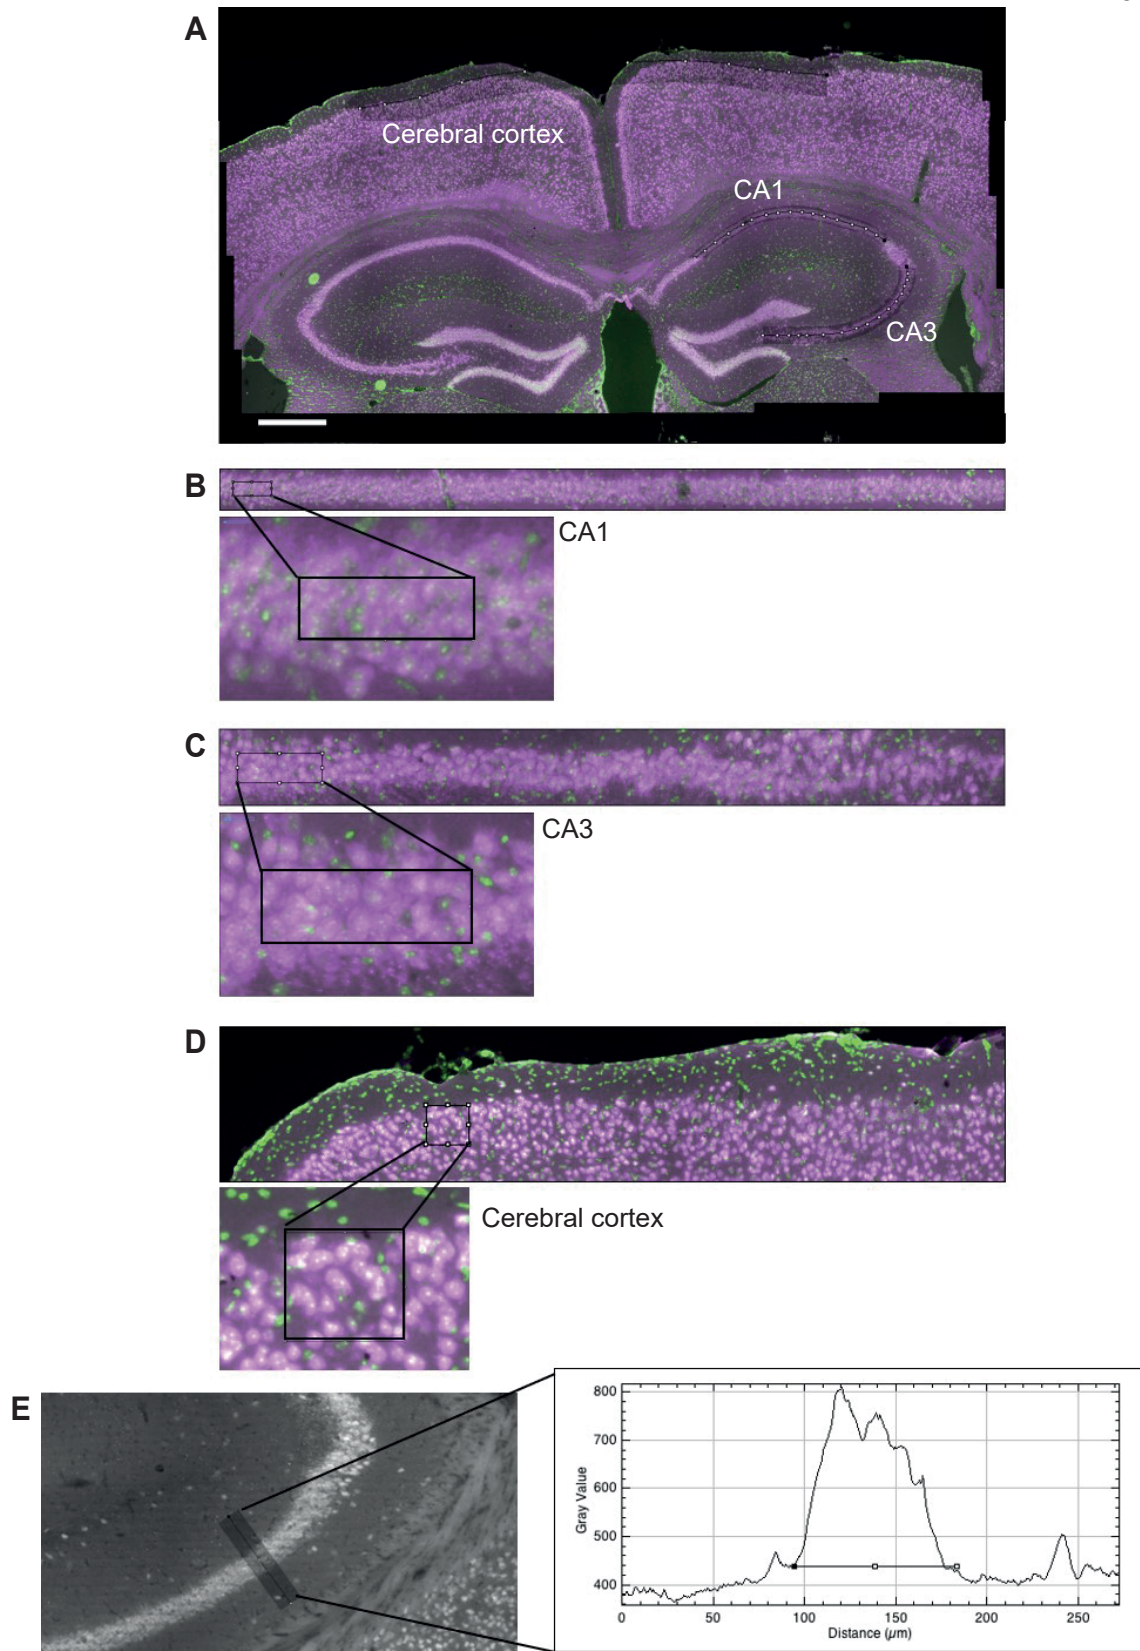

**Figure S4. Details of neuronal density analysis in wild-type (WT) and *P2ry6*<sup>-/-</sup> mice following i.c.v injection of vehicle or A $\beta$ .** **A**, Larger view of mouse brain slice including cortical and hippocampal regions stained for nuclei (with DAPI, green) and for neuronal nuclei (with anti-NeuN antibody, magenta). Regions of interest for quantification in CA1, CA3 and cerebral cortex are shown. Scale bar, 500  $\mu\text{m}$ . **B-D**, Representative images of CA1 hippocampus (**B**), CA3 hippocampus (**C**) or cerebral cortex (**D**). **E**, Representative image showing the stratum pyramidale histology of the CA1 hippocampus and histogram showing how width was estimated. Related to Figure 2.



A

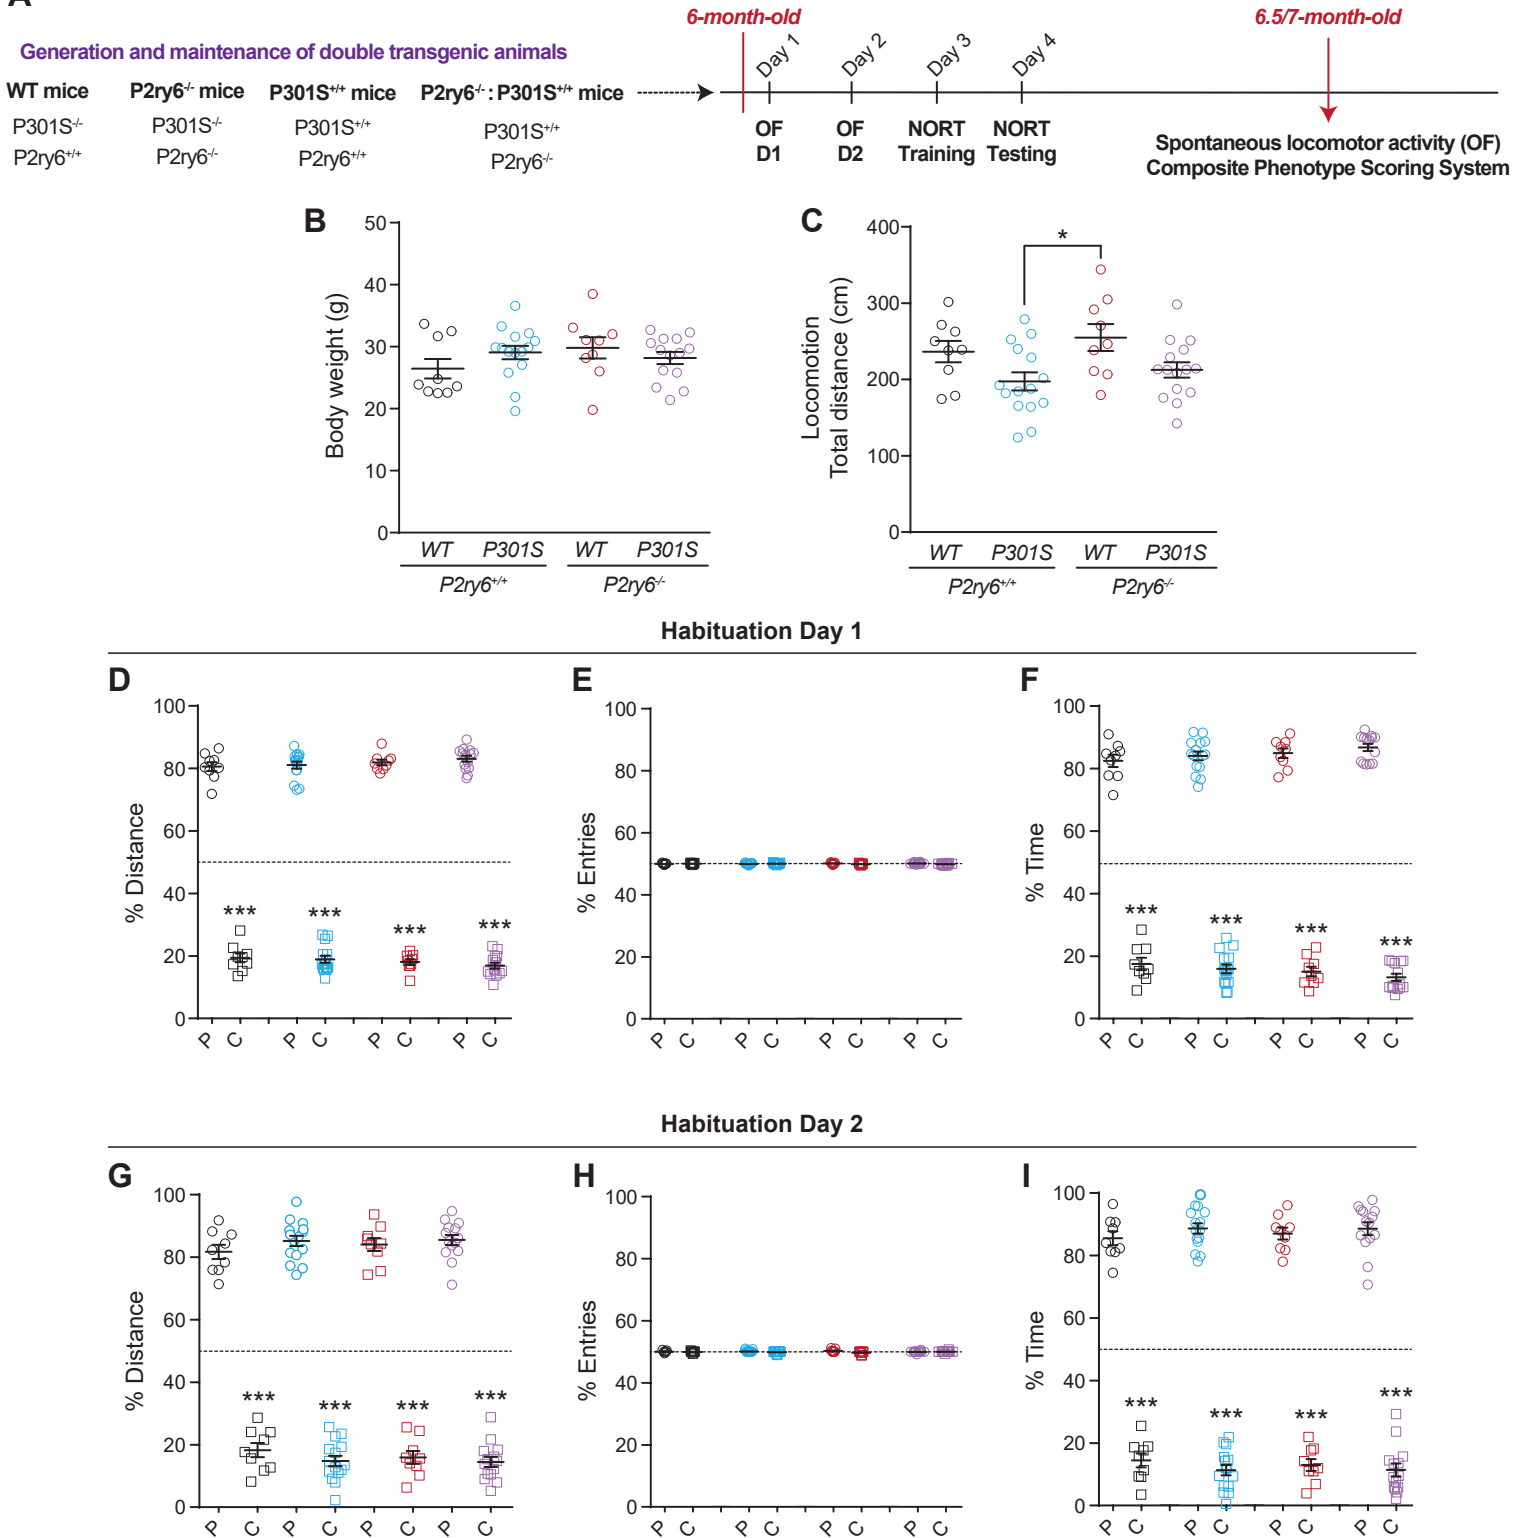

**Figure S5. Body weight, locomotion, and anxiety and motivation in the open field are not significantly affected by P301S tau or P2ry6 knockout at 6 months of age.** **A**, Timeline for generation and behavioral assessment of P2ry6<sup>+/+</sup>:P301S<sup>-/-</sup>, P2ry6<sup>+/+</sup>:P301S<sup>+/+</sup>, P2ry6<sup>-/-</sup>:P301S<sup>-/-</sup> and P2ry6<sup>-/-</sup>:P301S<sup>+/+</sup> mice. At 6 months of age, mice were tested with open field (OF) and novel object recognition test (NORT, testing 24 hours after training). At 6.5-7 months of age, spontaneous locomotor activity and disease severity (hind limb claspings, ledge test, gait and kyphosis) was evaluated, followed by sacrifice of the mice and brain perfusion. **B**, Body weight of mice at 6 months of age. **C**, Spontaneous locomotion in open field at 6 months of age. Each data point represents one animal and error bars represent mean ± SEM. Data were analysed by two-way ANOVA with Tukey-corrected post-hoc comparisons. \* p < 0.05. For each graph, all genotypes were compared, and if there is no marker of significance on the graph, then any difference was not significant. **D-I**, Motivation and anxiety differences between genotypes were analyzed by measuring the percentage of distance (**D** and **G**), the percentage of entries (**E** and **H**) and the percentage of time spent (**F** and **I**) between the periphery (P) and the center (C) in the open field arena at the first (**D-F**) or second (**G-I**) day of habituation in the open field arena (15 minutes/day). Dashed lines indicate 50% chance level. Each data point represents one animal and error bars represent mean ± SEM. Statistical analysis was performed using one-way ANOVA with Bonferroni post hoc comparisons; \*\*\*p < 0.001 compared with the periphery. Related to Figure 3.

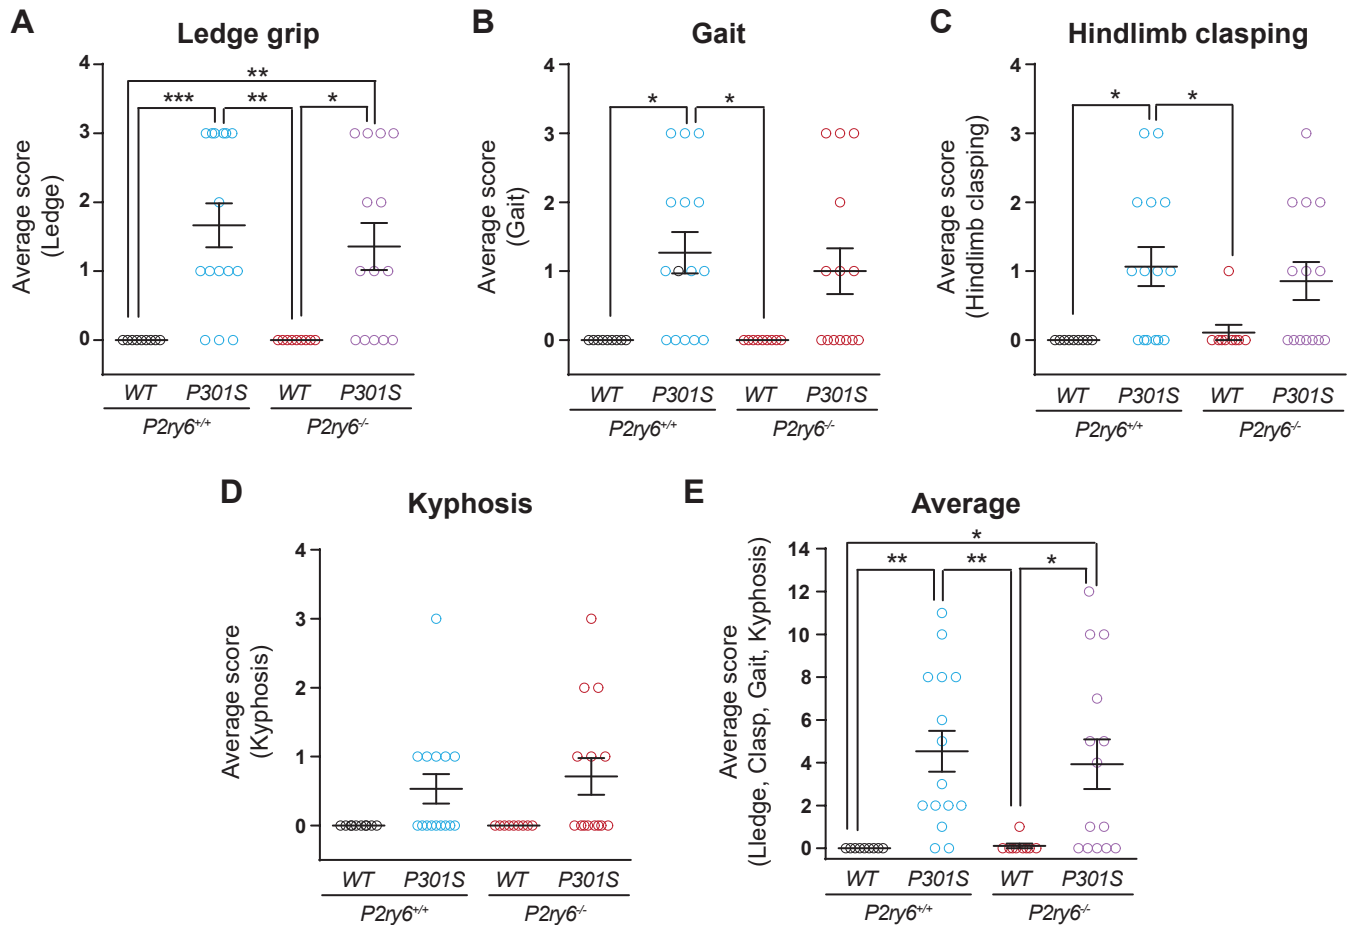

**Figure S6. P301S tau mice develop motor deficits at 7 months, but these are not reduced in double transgenic ( $P2ry6^{-/-}$ :  $P301S^{+/+}$  mice).** Histograms showing motor function of wild-type (WT), transgenic P301S ( $P301S^{+/+}$ ),  $P2ry6$  knockout ( $P2ry6^{-/-}$ ), and new double transgenic ( $P2ry6^{-/-}$ :  $P301S^{+/+}$ ) mice at 7 months of age. **A**, Ledge. **B**, Gait. **C**, Hind limb clasping. **D**, Kyphosis. Data were analysed by two-way ANOVA with Tukey corrected post-hoc comparisons. \* $p < 0.05$ , \*\* $p < 0.01$  and \*\*\* $p < 0.001$ . For each graph, all genotypes were compared, and if there is no marker of significance on the graph, then any difference was not significant. Related to Figure 3.

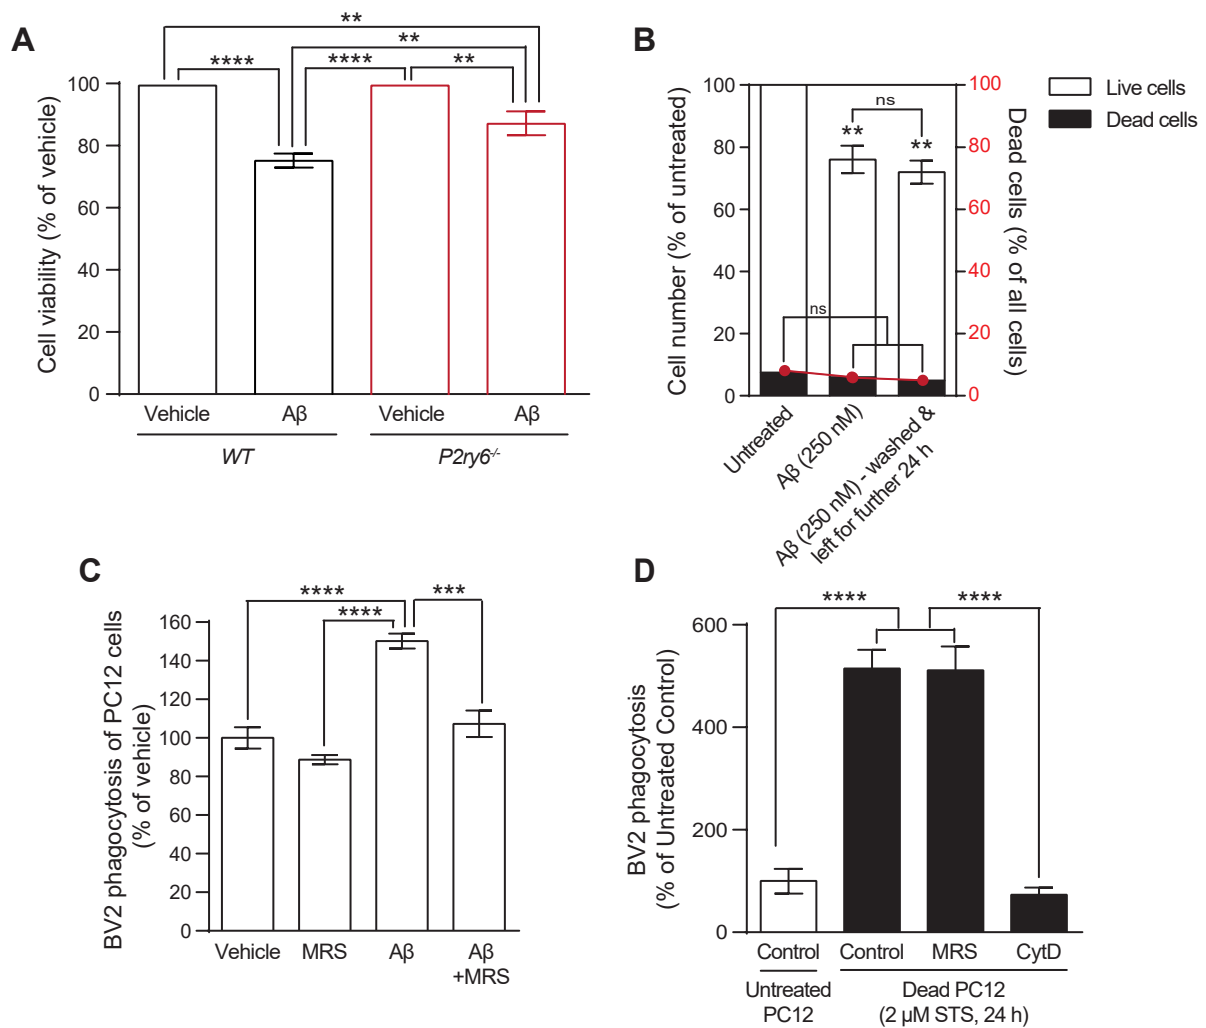

**Figure S7. In vitro studies.** **A**, Mixed neuronal-glia cultures from cerebella of wild-type (WT) or P2ry6<sup>-/-</sup> mice were treated for 3 days with  $\pm$  250 nM A $\beta$ , then cell viability was measured by MTT assay. Data represent mean  $\pm$  SEM (N=5-9). Statistical analysis was performed using two-way ANOVA with post hoc Tukey's multiple comparison test. \*\* p<0.01, \*\*\*\* p<0.0001. **B**, PC12 cells were treated  $\pm$  250 nM A $\beta$  for 24 hours, and live and dead cells counted, to estimate proliferation and death (N=3). Another set of cells was washed and cultured for a further 24 hours, to check there was no delayed death. A $\beta$  reduced PC12 cell proliferation, but did not induce any PC12 cell death. \*\*p<0.01 compared with untreated. **C**, PC12 cells treated  $\pm$  250 nM A $\beta$  for 24 hours were added to LPS-pre-treated BV-2 microglia  $\pm$  1  $\mu$ M MRS2578 for 3 hours, then BV-2 phagocytosis of the PC12 assayed by flow cytometry (N=4). MRS2578 prevented the phagocytosis of A $\beta$ -stressed PC12 cells, but not unstressed cells. \*\*\* p<0.001, \*\*\*\* p<0.0001. **D**, PC12 cells treated  $\pm$  2  $\mu$ M staurosporine (STS, to induce cell death) for 24 hours were added to LPS-pre-treated BV-2 microglia  $\pm$  1  $\mu$ M MRS2578 (MRS, to inhibit P2Y<sub>6</sub>R)  $\pm$  1  $\mu$ M cytochalasin D (CytD, to inhibit all phagocytosis) for 3 hours, then BV-2 phagocytosis of the PC12 cells was assayed by flow cytometry (N=3). The P2Y<sub>6</sub>R inhibitor had no effect on the phagocytosis of dead PC12 cells. Data represent mean  $\pm$  SEM. Statistical analysis was performed using one-way ANOVA with post hoc Tukey's multiple comparison test. \*\*\*\* p<0.0001. Related to Figure 4.

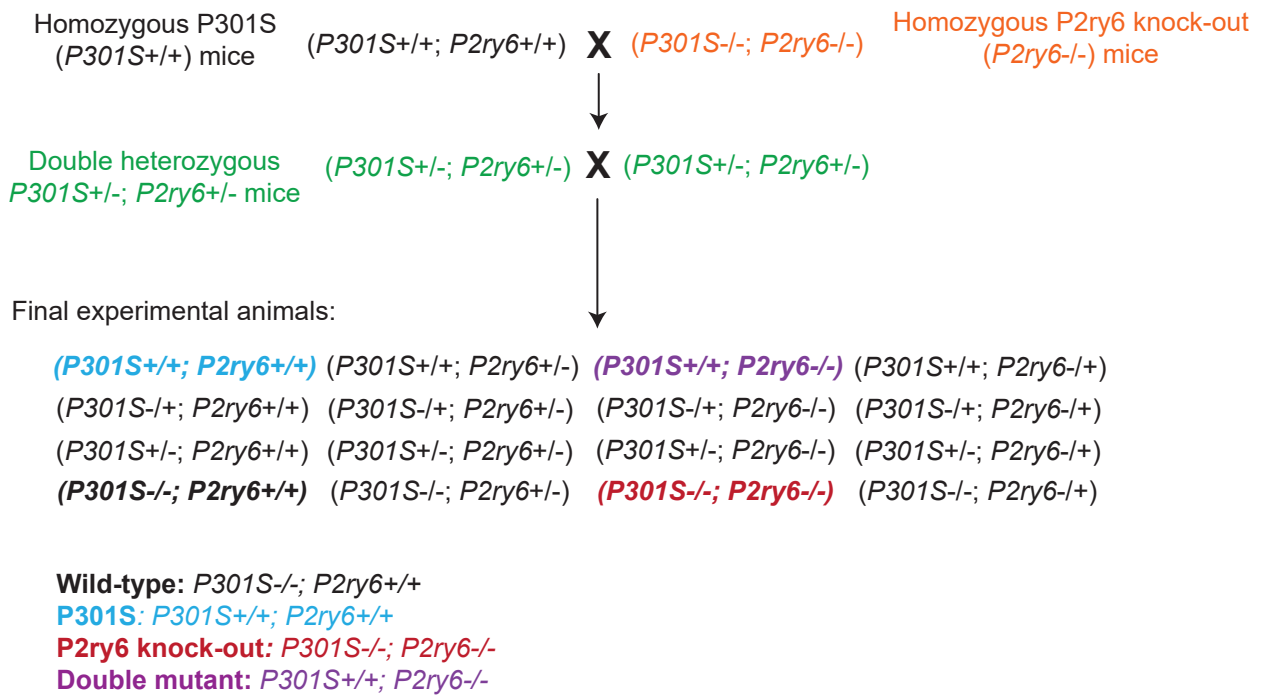

**Figure S8. Schematic representation showing the breeding strategy for the generation of a new double transgenic mice expressing human mutant P301S tau and lacking the expression of P2Y6 receptor (P301S<sup>+/+</sup>; P2ry6<sup>-/-</sup>). Related to Figure 3.**
